# Supplementary material
Source: PubMed Central journal article supplement (PMC5953423)
Supplement: NIHMS962798-supplement-supplement_1.pdf [file NIHMS962798-supplement-supplement_1.pdf]

## Supplementary Figure Legends

**Supplementary Figure 1. Male offspring heart and kidney weights for each dietary comparison.** Heart or kidney weight (A) on a post-weaning high fat diet and (B) on an LF12 post-weaning diet. \*p-value<0.05, \*\*p-value<0.01

**Supplementary Figure 2. GVAD-LF12 does not affect body composition in female littermates.** Physiological parameters are presented for female littermates of the diet parameters in **Figure 3**. (A) Body weight (B) Epididymal fat pad weight (C) Correlation between fat and body weight (D) Liver weight (E) Kidney weight \*p-value<0.05, \*\*p-value<0.01

Supplementary Figure 1

Heart

Kidney

**A**

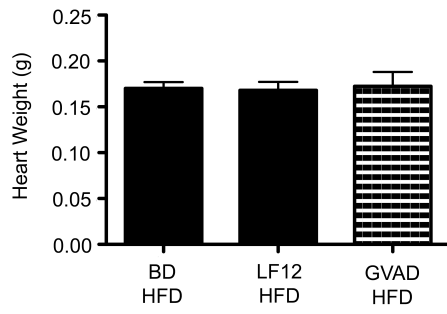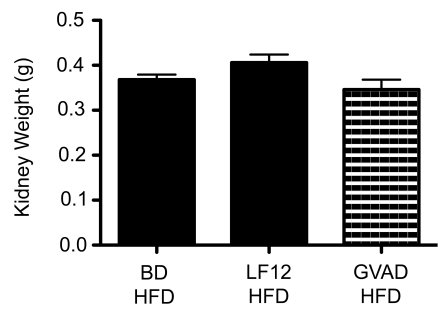

**B**

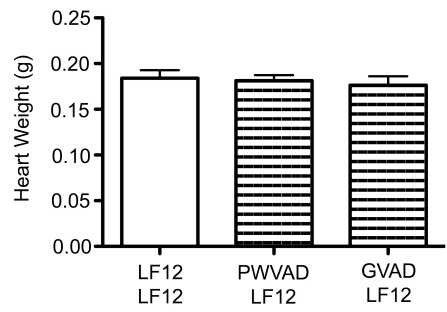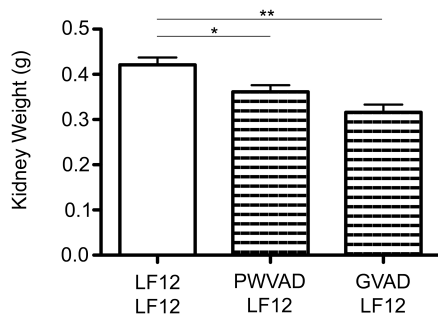

Supplementary Figure 2

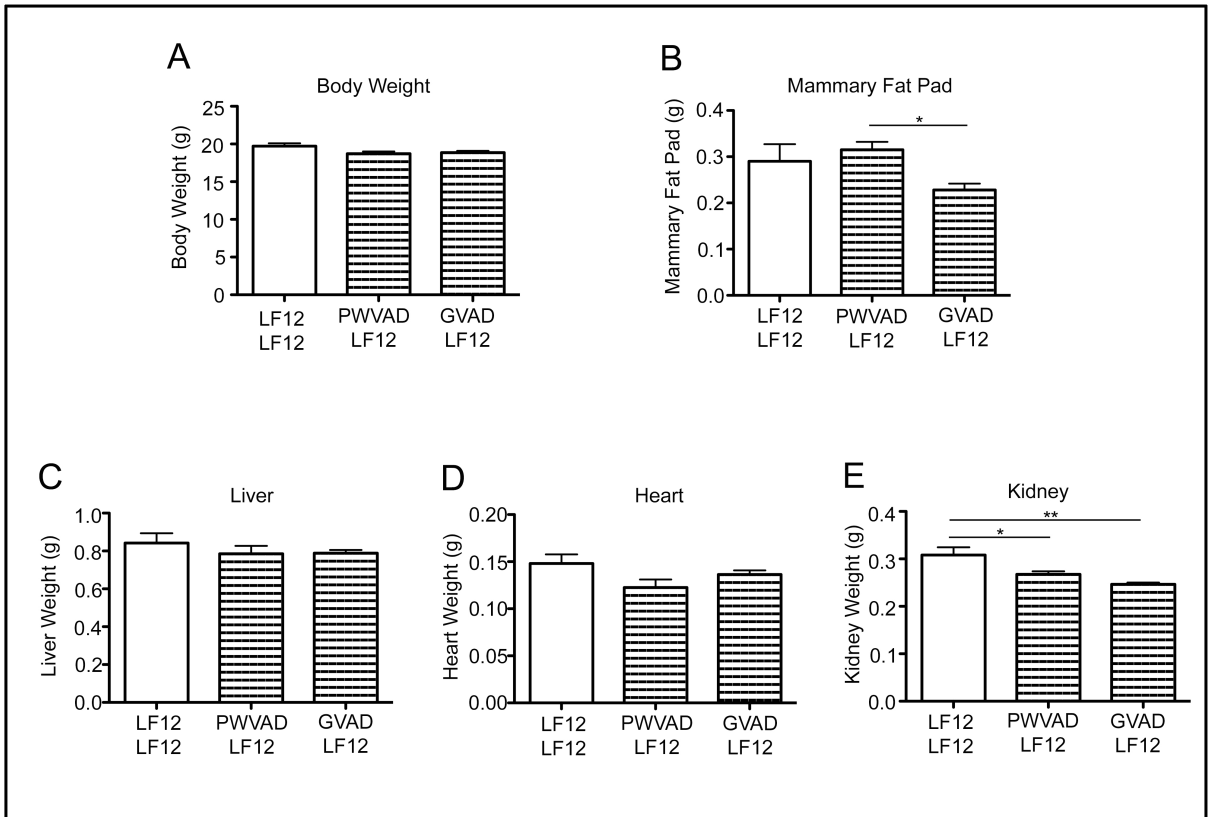

Supplementary Table 1. Diet Compositions

|                               | <b>BD<sup>+</sup></b> | <b>LFD</b>          | <b>LF12</b>       | <b>VAD</b>        | <b>HFD</b>          | <b>HFD-VAD</b>    |
|-------------------------------|-----------------------|---------------------|-------------------|-------------------|---------------------|-------------------|
| Catalog Number                | 2019                  | D12450B             | TD. 07291         | TD. 07655         | D12492              | TD.08210          |
| Production Company            | Harlan Teklad         | Research Diets      | Harlan Teklad     | Harlan Teklad     | Research Diets      | Harlan Teklad     |
| Casein (g)                    | Crude Protein         | 200                 | 190               | 190               | 200                 | 190               |
| L-Cystine (g)                 |                       | 3                   | 3                 | 3                 | 3                   | 3                 |
| Cornstarch (g)                |                       | 315                 | 393.2             | 393.2             | 0                   | 13                |
| Maltodextrin (g)              |                       | 35                  | 130               | 130               | 125                 | 200               |
| Sucrose (g)                   |                       | 350                 | 150               | 150               | 69                  | 150               |
| Cellulose (g)                 |                       | 50                  | 40                | 40                | 50                  | 40                |
| Lard (g)                      |                       | 20                  |                   |                   | 245                 | 310               |
| Cottonseed Oil (g)            |                       |                     | 50                | 50                |                     | 50                |
| Soybean Oil (g)               | U.Q.                  | 25                  |                   |                   | 25                  |                   |
| Mineral Mix (g)               |                       | S10026<br>10        | AIN-93G-MX<br>35  | AIN-93G-MX<br>35  | S10026<br>10        | AIN-93G-MX<br>35  |
| Vitamin Mix (g)               |                       | <b>V10001</b><br>10 | <b>83171</b><br>5 | <b>83171</b><br>5 | <b>V10001</b><br>10 | <b>83171</b><br>5 |
| Choline (g)                   |                       | 2                   | 3.5               | 3.5               | 2                   | 3.5               |
| Vitamin E (IU/kg)             | 110                   |                     | 121               | 121               |                     | 121               |
| Vitamin D <sub>3</sub> (IU/g) | 1.5                   |                     | 2.2               | 2.2               |                     | 2.2               |
| Vitamin A Palmitate (IU/g)    | 15                    | 5.2                 | 24                | 0.22              | 5.2                 | 0.22              |
| Protein (%kcal)               | 23.0                  | 20.0                | 18.8              | 18.8              | 20.0                | 12.9              |
| Carbohydrate (%kcal)          | 55.0                  | 70.0                | 69.0              | 69.0              | 20.0                | 26.9              |
| Fat (%kcal)                   | 22.0                  | 10.0                | 12.2              | 12.2              | 60.0                | 60.1              |

<sup>+</sup> BD (2019, Harlan Teklad) diet is largely a proprietary composition

U.Q. Unknown Quantity, diet contains this ingredient, but at an undisclosed quantity

**Supplementary Table 2: HF genes are largely reversed by GVAD-HFD**

Relative expression calculated as the mean LFD Cy5 value (n=3)

Data represented as fold change (FC) of the upper condition versus the lower condition with p-value.

**Supplementary Table 3: *Shp*<sup>-/-</sup> responses**

Data represented as fold change (FC) of the upper condition versus the lower condition with p-value. *Shp*<sup>-/-</sup> values were determined by Kim S.C, et al. (2014) [39]

Supplementary Table 2

| Gene Symbol       | Relative Expression | BD-HFD | P.Value | GVAD-BD-HFD | P.Value |
|-------------------|---------------------|--------|---------|-------------|---------|
|                   |                     | BD-LFD |         |             |         |
| Arrdc3            | 2011                | 3.51   | 0.01    | -3.69       | 0.00    |
| Aatk              | 873                 | 3.62   | 0.03    | -3.68       | 0.02    |
| Cyp2c54           | 2380                | 7.41   | 0.01    | -3.64       | 0.02    |
| Nr0b2             | 552                 | 2.24   | 0.00    | -2.90       | 0.01    |
| Cyp2c37           | 7277                | 4.35   | 0.03    | -2.90       | 0.01    |
| Hmgcs1            | 812                 | 2.16   | 0.03    | -2.71       | 0.01    |
| Oat               | 35497               | 2.17   | 0.02    | -2.51       | 0.00    |
| Sult5a1           | 221                 | 3.60   | 0.02    | -2.42       | 0.00    |
| Hpgd              | 1900                | 2.04   | 0.01    | -2.38       | 0.00    |
| Car8              | 1842                | 2.48   | 0.01    | -2.31       | 0.00    |
| Cyp2c39           | 7367                | 2.94   | 0.01    | -2.27       | 0.01    |
| N4bp211           | 1054                | 2.06   | 0.01    | -2.22       | 0.00    |
| 2810007J24Rik     | 21292               | 4.12   | 0.05    | -2.21       | 0.04    |
| Chpt1             | 4164                | 2.10   | 0.00    | -2.17       | 0.00    |
| Lect2             | 10904               | 2.33   | 0.04    | -2.15       | 0.00    |
| ENSMUST0000008036 | 30219               | 2.02   | 0.01    | -2.04       | 0.00    |
| Idi1              | 18166               | 2.04   | 0.01    | -2.03       | 0.07    |
| Apol7a            | 4554                | 2.10   | 0.02    | -2.03       | 0.00    |
| Cyp51             | 1851                | 2.12   | 0.00    | -2.02       | 0.03    |
| Herpud1           | 24252               | 3.40   | 0.00    | -2.00       | 0.00    |
| Dnaja1            | 2026                | 2.32   | 0.00    | -2.00       | 0.00    |
| Apol7c            | 3618                | 2.14   | 0.03    | -1.93       | 0.01    |
| Nr1i3             | 1631                | 3.01   | 0.03    | -1.82       | 0.00    |
| Tsc22d3           | 5570                | 3.04   | 0.05    | -1.73       | 0.01    |
| Slco1b2           | 52166               | 2.32   | 0.03    | -1.71       | 0.06    |
| Aldh1a1           | 57622               | 2.03   | 0.02    | -1.70       | 0.03    |
| Slc1a2            | 385                 | 4.05   | 0.05    | -1.69       | 0.01    |
| Acpp              | 272                 | -2.95  | 0.01    | -1.69       | 0.05    |
| Sult1b1           | 1272                | 3.16   | 0.00    | -1.66       | 0.05    |
| 9530008L14Rik     | 227                 | 2.04   | 0.03    | -1.66       | 0.00    |
| Mmd               | 3804                | 2.60   | 0.00    | -1.64       | 0.00    |
| 4933403F05Rik     | 433                 | 2.04   | 0.00    | -1.64       | 0.00    |
| Ncald             | 614                 | 2.17   | 0.00    | -1.61       | 0.02    |
| Prkd3             | 636                 | 2.70   | 0.00    | -1.60       | 0.03    |
| 3110001K24Rik     | 431                 | 2.04   | 0.00    | -1.58       | 0.00    |
| 3110049J23Rik     | 2306                | 2.09   | 0.02    | -1.53       | 0.00    |
| Rnf125            | 14651               | -2.61  | 0.04    | -1.53       | 0.00    |
| Hif               | 533                 | 2.21   | 0.04    | -1.50       | 0.10    |
| Klf15             | 9525                | 2.28   | 0.00    | -1.49       | 0.00    |
| 5033411D12Rik     | 2182                | 2.03   | 0.03    | -1.47       | 0.01    |
| Hsd17b7           | 971                 | 2.04   | 0.00    | -1.47       | 0.02    |
| Cyp2c29           | 27004               | 2.21   | 0.01    | -1.44       | 0.07    |
| Adam11            | 384                 | -2.78  | 0.00    | -1.42       | 0.01    |
| Tubb2a            | 77211               | -2.88  | 0.04    | -1.40       | 0.44    |
| Nox4              | 518                 | 2.36   | 0.03    | -1.39       | 0.08    |
| Setd4             | 390                 | 2.38   | 0.00    | -1.37       | 0.01    |
| Chka              | 4049                | -2.46  | 0.00    | -1.36       | 0.39    |
| Pon1              | 41764               | 2.13   | 0.02    | -1.34       | 0.03    |
| Pnpla3            | 422                 | -10.09 | 0.03    | -1.32       | 0.35    |

|               |       |       |      |       |      |
|---------------|-------|-------|------|-------|------|
| BC057022      | 414   | -2.65 | 0.04 | -1.32 | 0.03 |
| Ugt3a2        | 510   | 2.36  | 0.04 | -1.29 | 0.07 |
| Il1b          | 732   | -3.05 | 0.00 | -1.27 | 0.29 |
| Cyp2e1        | 32365 | 3.94  | 0.03 | -1.27 | 0.23 |
| Pnpla5        | 358   | -4.81 | 0.02 | -1.19 | 0.08 |
| Ppm1k         | 1305  | 2.55  | 0.00 | -1.17 | 0.31 |
| Tdo2          | 23318 | 2.20  | 0.00 | -1.16 | 0.10 |
| Slc2a9        | 250   | 2.07  | 0.01 | -1.13 | 0.28 |
| Cdca2         | 225   | -2.74 | 0.04 | -1.13 | 0.11 |
| Decr1         | 271   | 2.15  | 0.01 | -1.11 | 0.41 |
| Slc16a6       | 2126  | -2.11 | 0.01 | -1.10 | 0.63 |
| 4930452B06Rik | 297   | -2.14 | 0.01 | -1.08 | 0.52 |
| Nudt12        | 206   | 2.02  | 0.00 | -1.07 | 0.16 |
| Map3k1        | 2495  | -2.71 | 0.01 | -1.03 | 0.47 |
| Rhbd2         | 1335  | -2.06 | 0.00 | -1.02 | 0.79 |
| Dars          | 1557  | 2.04  | 0.02 | -1.01 | 0.82 |
| Dhrs9         | 445   | -2.04 | 0.01 | -1.00 | 1.00 |
| Pus10         | 328   | 2.00  | 0.03 | -1.00 | 1.00 |
| Rragd         | 492   | -2.76 | 0.05 | 1.00  | 0.99 |
| Col15a1       | 252   | -2.57 | 0.00 | 1.01  | 0.94 |
| Hnrnpa1       | 1753  | -2.33 | 0.04 | 1.02  | 0.78 |
| Incenp        | 2058  | -2.01 | 0.03 | 1.02  | 0.73 |
| Igf1          | 547   | -3.28 | 0.04 | 1.04  | 0.29 |
| Gpam          | 1381  | -2.88 | 0.01 | 1.05  | 0.57 |
| Gramd4        | 2127  | -2.35 | 0.00 | 1.06  | 0.70 |
| Nid2          | 562   | -2.02 | 0.01 | 1.06  | 0.57 |
| Orm2          | 30548 | -2.37 | 0.02 | 1.08  | 0.72 |
| Gpi1          | 74198 | -2.01 | 0.00 | 1.09  | 0.38 |
| Frmd5         | 323   | -5.50 | 0.04 | 1.12  | 0.56 |
| Atp2b2        | 421   | -4.66 | 0.00 | 1.12  | 0.51 |
| Car2          | 1142  | -2.21 | 0.00 | 1.16  | 0.12 |
| Gins2         | 236   | -2.00 | 0.02 | 1.16  | 0.24 |
| Cdca5         | 498   | -2.78 | 0.04 | 1.16  | 0.43 |
| Tuba8         | 763   | -2.56 | 0.00 | 1.18  | 0.42 |
| Mmp14         | 10280 | -2.07 | 0.05 | 1.18  | 0.03 |
| Tacc3         | 225   | -2.46 | 0.03 | 1.18  | 0.31 |
| Elf3          | 662   | -3.36 | 0.04 | 1.20  | 0.39 |
| Plk2          | 1948  | -2.01 | 0.05 | 1.22  | 0.12 |
| Nr4a1         | 3030  | -3.48 | 0.00 | 1.24  | 0.15 |
| 9130404D14Rik | 354   | -2.45 | 0.00 | 1.25  | 0.16 |
| Cotl1         | 5714  | -2.03 | 0.02 | 1.28  | 0.14 |
| Notch3        | 334   | -2.96 | 0.00 | 1.29  | 0.05 |
| Nfkb2         | 1094  | -2.00 | 0.01 | 1.32  | 0.10 |
| Acacb         | 9089  | -3.16 | 0.02 | 1.35  | 0.00 |
| Pdzk1ip1      | 1645  | -2.30 | 0.01 | 1.35  | 0.07 |
| Spon2         | 6497  | -2.18 | 0.01 | 1.38  | 0.35 |
| Apcs          | 4144  | -2.36 | 0.05 | 1.40  | 0.12 |
| G6pdx         | 1619  | -3.39 | 0.00 | 1.42  | 0.00 |
| Scd2          | 6265  | -4.53 | 0.04 | 1.43  | 0.01 |
| Fosl2         | 399   | -2.05 | 0.03 | 1.45  | 0.05 |
| Spink3        | 2935  | -6.74 | 0.03 | 1.48  | 0.14 |
| Ltb4dh        | 2303  | -2.11 | 0.03 | 1.50  | 0.13 |

|               |       |       |      |      |      |
|---------------|-------|-------|------|------|------|
| Cdc2a         | 547   | -2.36 | 0.03 | 1.50 | 0.05 |
| Ccnb1         | 232   | -6.55 | 0.05 | 1.52 | 0.43 |
| Foxm1         | 238   | -2.93 | 0.01 | 1.53 | 0.23 |
| Tubb6         | 7759  | -2.46 | 0.04 | 1.54 | 0.08 |
| Relb          | 2310  | -3.26 | 0.01 | 1.56 | 0.05 |
| 4833422F24Rik | 938   | -2.04 | 0.03 | 1.57 | 0.03 |
| 5530400B01Rik | 670   | -2.79 | 0.02 | 1.58 | 0.17 |
| Nck2          | 590   | -2.07 | 0.01 | 1.61 | 0.07 |
| Mcm10         | 5909  | 2.12  | 0.04 | 1.64 | 0.00 |
| Prkx          | 921   | -2.16 | 0.00 | 1.64 | 0.00 |
| 1200009I06Rik | 410   | -2.81 | 0.02 | 1.66 | 0.05 |
| Itga6         | 551   | -3.11 | 0.03 | 1.69 | 0.00 |
| Fbln1         | 240   | -2.64 | 0.05 | 1.71 | 0.08 |
| Steap2        | 293   | -2.51 | 0.05 | 1.72 | 0.00 |
| Capg          | 1260  | -2.02 | 0.01 | 1.73 | 0.02 |
| Arhgef16      | 1264  | -3.07 | 0.00 | 1.75 | 0.01 |
| Tnfrsf12a     | 7032  | -2.39 | 0.05 | 1.75 | 0.13 |
| Chrna4        | 298   | -5.12 | 0.05 | 1.76 | 0.09 |
| Socs3         | 6345  | -2.13 | 0.05 | 1.77 | 0.03 |
| Fndc3b        | 2602  | -2.51 | 0.04 | 1.78 | 0.00 |
| Cdt1          | 1695  | -2.18 | 0.04 | 1.83 | 0.00 |
| Evc           | 378   | -2.72 | 0.03 | 1.86 | 0.00 |
| Sstr2         | 636   | -2.17 | 0.04 | 1.86 | 0.02 |
| Atg16l2       | 1600  | -2.15 | 0.01 | 1.88 | 0.00 |
| Vill          | 337   | -2.03 | 0.01 | 1.90 | 0.00 |
| Icam1         | 7595  | -3.12 | 0.03 | 1.91 | 0.00 |
| Kif4          | 292   | -3.63 | 0.01 | 1.92 | 0.04 |
| 5730416F02Rik | 231   | -2.03 | 0.02 | 1.99 | 0.00 |
| Adam8         | 515   | -2.35 | 0.04 | 2.00 | 0.03 |
| Tmem51        | 4160  | -2.40 | 0.00 | 2.01 | 0.00 |
| Igsf8         | 923   | -2.09 | 0.00 | 2.02 | 0.00 |
| Per1          | 327   | 2.38  | 0.02 | 2.04 | 0.01 |
| Cdkn2c        | 2793  | -2.04 | 0.01 | 2.05 | 0.00 |
| A330021E22Rik | 207   | -2.71 | 0.04 | 2.06 | 0.01 |
| Upp2          | 1361  | 3.04  | 0.01 | 2.08 | 0.00 |
| Tmem159       | 697   | -2.26 | 0.00 | 2.09 | 0.00 |
| Tef           | 969   | 3.34  | 0.01 | 2.10 | 0.00 |
| Ostb          | 241   | -2.57 | 0.00 | 2.15 | 0.05 |
| Slc37a1       | 548   | -2.54 | 0.03 | 2.20 | 0.02 |
| Ier3          | 423   | -3.65 | 0.03 | 2.28 | 0.00 |
| Setd7         | 740   | -2.04 | 0.02 | 2.29 | 0.00 |
| Gucy2c        | 501   | -2.25 | 0.04 | 2.31 | 0.00 |
| Slc7a7        | 3701  | -2.38 | 0.01 | 2.33 | 0.00 |
| Cd9           | 6878  | -4.27 | 0.00 | 2.33 | 0.01 |
| Phlda2        | 370   | -3.46 | 0.04 | 2.40 | 0.01 |
| Pck2          | 1682  | -2.40 | 0.01 | 2.54 | 0.00 |
| Lpl           | 3465  | -3.34 | 0.02 | 2.66 | 0.01 |
| Spag5         | 280   | -4.09 | 0.01 | 2.76 | 0.00 |
| Gipc2         | 305   | -3.63 | 0.03 | 2.86 | 0.00 |
| Smpd3         | 745   | -2.77 | 0.03 | 3.10 | 0.00 |
| Jazf1         | 226   | -5.64 | 0.00 | 3.13 | 0.01 |
| Rbp1          | 13838 | -2.47 | 0.04 | 3.24 | 0.00 |



|             |       |       |      |      |      |
|-------------|-------|-------|------|------|------|
| Slc6a8      | 1608  | -3.00 | 0.00 | 3.26 | 0.00 |
| Galnt12     | 648   | -2.32 | 0.03 | 3.30 | 0.00 |
| Dbp         | 1325  | 3.72  | 0.00 | 3.66 | 0.00 |
| Igh-2       | 5158  | -7.89 | 0.01 | 3.87 | 0.00 |
| Prss8       | 385   | -3.29 | 0.01 | 4.62 | 0.00 |
| Rps6k11     | 327   | -5.26 | 0.00 | 4.67 | 0.00 |
| A_51P327496 | 76607 | -4.00 | 0.03 | 4.75 | 0.00 |
| Adrbk2      | 278   | -2.08 | 0.01 | 4.79 | 0.00 |
| Igh-VJ558   | 12561 | -6.12 | 0.01 | 4.90 | 0.00 |
| Marco       | 14716 | -3.90 | 0.05 | 4.94 | 0.01 |
| Gadd45g     | 30433 | -4.79 | 0.01 | 5.06 | 0.00 |
| Mtmt11      | 481   | -6.28 | 0.02 | 5.83 | 0.00 |
| Tff3        | 10204 | -6.43 | 0.00 | 8.66 | 0.00 |

Supplementary Table 3

| Gene Symbol   | SHP-/- WD |      | P.Value | GVAD-HFD |           | P.Value | GVAD-LF12 |  |
|---------------|-----------|------|---------|----------|-----------|---------|-----------|--|
|               | WT        | WD   |         | BD-HFD   | LF12-LF12 |         | P.Value   |  |
| A930016D02Rik | 3.43      | 0.00 | -17.31  | 0.00     | 1.50      | 0.22    |           |  |
| BC027556      | 11.70     | 0.03 | -11.63  | 0.00     | -1.07     | 0.78    |           |  |
| Dct           | 17.10     | 0.00 | -10.94  | 0.00     | 3.45      | 0.01    |           |  |
| Serpinb1a     | 8.02      | 0.00 | -9.02   | 0.00     | 1.39      | 0.12    |           |  |
| Serpina12     | -9.01     | 0.00 | -7.51   | 0.03     | 2.44      | 0.01    |           |  |
| Aatk          | 2.22      | 0.05 | -3.68   | 0.02     | -1.06     | 0.73    |           |  |
| Rhbg          | 2.58      | 0.00 | -3.45   | 0.00     | -6.45     | 0.00    |           |  |
| Slc17a8       | 2.62      | 0.02 | -3.41   | 0.01     | 3.48      | 0.01    |           |  |
| Gdf15         | -2.90     | 0.00 | -3.10   | 0.00     | -2.65     | 0.00    |           |  |
| Cyp2c37       | 1.88      | 0.04 | -2.90   | 0.01     | 7.44      | 0.00    |           |  |
| Fign          | 1.59      | 0.05 | -2.79   | 0.00     | 1.46      | 0.08    |           |  |
| 4432416J03Rik | 1.71      | 0.16 | -2.60   | 0.03     | 4.06      | 0.00    |           |  |
| Ddit3         | -2.15     | 0.00 | -2.46   | 0.00     | -2.44     | 0.00    |           |  |
| Slc30a10      | 2.02      | 0.17 | -2.39   | 0.00     | 4.03      | 0.00    |           |  |
| Glul          | 1.52      | 0.07 | -2.38   | 0.01     | 2.22      | 0.01    |           |  |
| Cxcl10        | -3.53     | 0.00 | -2.34   | 0.00     | -3.71     | 0.00    |           |  |
| Hsf2          | 1.56      | 0.13 | -2.25   | 0.00     | -1.00     | 1.00    |           |  |
| Mogat1        | -4.14     | 0.06 | -2.22   | 0.00     | -1.94     | 0.03    |           |  |
| 2810007J24Rik | 2.84      | 0.00 | -2.21   | 0.04     | 2.28      | 0.01    |           |  |
| Aqp8          | -2.81     | 0.00 | -2.15   | 0.01     | -1.35     | 0.54    |           |  |
| Slc17a3       | 1.78      | 0.00 | -2.15   | 0.01     | 1.43      | 0.09    |           |  |
| Olig1         | -2.48     | 0.02 | -2.12   | 0.00     | -1.34     | 0.33    |           |  |
| Cxcl12        | 1.55      | 0.00 | -2.06   | 0.00     | 1.01      | 0.98    |           |  |
| Tbx3          | 2.67      | 0.00 | -2.06   | 0.01     | 1.21      | 0.27    |           |  |
| Adh4          | 1.54      | 0.00 | -2.05   | 0.00     | 1.15      | 0.73    |           |  |
| Hsd3b5        | 243.33    | 0.00 | -2.03   | 0.19     | 28.90     | 0.00    |           |  |
| Omd           | -1.93     | 0.11 | -1.99   | 0.00     | 1.33      | 0.30    |           |  |
| Dpyd          | 1.68      | 0.00 | -1.97   | 0.00     | 1.10      | 0.59    |           |  |
| Cxadr         | -1.88     | 0.00 | -1.93   | 0.00     | -2.10     | 0.00    |           |  |
| Cpox          | 1.96      | 0.06 | -1.90   | 0.02     | 1.33      | 0.19    |           |  |
| Sdro          | 2.77      | 0.00 | -1.90   | 0.00     | 1.59      | 0.14    |           |  |
| Akr1c19       | -1.72     | 0.16 | -1.88   | 0.00     | 1.05      | 0.79    |           |  |
| Abat          | 1.58      | 0.00 | -1.88   | 0.00     | 1.00      | 0.99    |           |  |
| Nqo2          | 1.55      | 0.00 | -1.86   | 0.00     | -1.52     | 0.04    |           |  |
| Aldh3a2       | -1.66     | 0.00 | -1.84   | 0.00     | -2.79     | 0.00    |           |  |
| Junb          | -1.61     | 0.02 | -1.83   | 0.00     | 1.44      | 0.43    |           |  |
| Fblim1        | -3.35     | 0.13 | -1.82   | 0.04     | -1.05     | 0.79    |           |  |
| Nr1i3         | 1.69      | 0.07 | -1.82   | 0.00     | 2.98      | 0.00    |           |  |
| Calca         | 1.70      | 0.11 | -1.79   | 0.16     | -1.08     | 0.72    |           |  |
| 2410002O22Rik | 1.55      | 0.20 | -1.79   | 0.00     | 1.47      | 0.04    |           |  |
| Gsta1         | -16.34    | 0.00 | -1.79   | 0.00     | -13.29    | 0.00    |           |  |
| Ccbl2         | 1.60      | 0.01 | -1.78   | 0.00     | 1.15      | 0.61    |           |  |
| 2510004L01Rik | -1.83     | 0.17 | -1.77   | 0.04     | -1.48     | 0.12    |           |  |
| Mmd2          | 2.27      | 0.00 | -1.77   | 0.21     | -9.51     | 0.00    |           |  |
| Eif2ak3       | -1.78     | 0.00 | -1.73   | 0.00     | -1.46     | 0.10    |           |  |
| Akr1c14       | 1.81      | 0.08 | -1.73   | 0.04     | 1.08      | 0.86    |           |  |
| Tsc22d3       | 1.94      | 0.01 | -1.73   | 0.01     | 2.23      | 0.01    |           |  |
| Eif4e         | 2.16      | 0.02 | -1.73   | 0.00     | 1.22      | 0.31    |           |  |
| Dmgdh         | 2.67      | 0.00 | -1.71   | 0.00     | 1.19      | 0.36    |           |  |

|               |       |      |       |      |        |      |
|---------------|-------|------|-------|------|--------|------|
| Fahd2a        | 1.60  | 0.05 | -1.71 | 0.00 | 1.28   | 0.16 |
| Gsta2         | -6.69 | 0.00 | -1.70 | 0.15 | -15.33 | 0.00 |
| Cth           | 2.10  | 0.01 | -1.69 | 0.00 | -1.38  | 0.22 |
| Slc1a2        | 2.38  | 0.00 | -1.69 | 0.01 | 2.28   | 0.00 |
| Caln1         | 2.19  | 0.04 | -1.66 | 0.00 | 2.08   | 0.01 |
| Tyki          | -2.11 | 0.01 | -1.66 | 0.01 | -1.49  | 0.04 |
| Lag3          | 3.57  | 0.00 | -1.65 | 0.08 | 1.49   | 0.30 |
| Ela1          | 2.79  | 0.04 | -1.65 | 0.03 | -2.29  | 0.01 |
| Hdhd3         | 1.76  | 0.02 | -1.65 | 0.00 | 1.40   | 0.16 |
| Yaf2          | 1.53  | 0.20 | -1.65 | 0.00 | -1.09  | 0.66 |
| D930010J01Rik | 1.59  | 0.01 | -1.64 | 0.00 | 2.07   | 0.01 |
| BC029214      | 2.15  | 0.00 | -1.62 | 0.00 | 2.14   | 0.01 |
| Hist2h2aa1    | 1.51  | 0.00 | -1.61 | 0.00 | -1.37  | 0.08 |
| Phtf2         | 1.51  | 0.16 | -1.61 | 0.01 | -1.17  | 0.36 |
| Plxna2        | -1.60 | 0.14 | -1.61 | 0.02 | 1.09   | 0.75 |
| Cib2          | 3.26  | 0.00 | -1.61 | 0.00 | 1.45   | 0.05 |
| BC005682      | 1.52  | 0.01 | -1.59 | 0.00 | -1.05  | 0.83 |
| Cfhr1         | 1.59  | 0.00 | -1.58 | 0.00 | 1.48   | 0.04 |
| Slco1a4       | -1.58 | 0.05 | -1.57 | 0.07 | 4.61   | 0.00 |
| 1300012D20Rik | 2.21  | 0.01 | -1.56 | 0.09 | -1.17  | 0.42 |
| 6430559E15Rik | 1.55  | 0.00 | -1.55 | 0.00 | 1.17   | 0.49 |
| Cyp2d13       | 2.09  | 0.00 | -1.54 | 0.01 | -1.51  | 0.04 |
| 9130409I23Rik | -4.20 | 0.00 | -1.54 | 0.01 | -2.36  | 0.04 |
| Ccl2          | 23.33 | 0.02 | -1.54 | 0.22 | -4.17  | 0.00 |
| S100a10       | -1.69 | 0.00 | -1.54 | 0.01 | -2.34  | 0.00 |
| Mkks          | 1.51  | 0.00 | -1.54 | 0.00 | 1.17   | 0.34 |
| Igfals        | 1.83  | 0.00 | -1.52 | 0.05 | 1.04   | 0.83 |
| Wnt2          | 1.78  | 0.02 | -1.52 | 0.05 | 1.39   | 0.11 |
| Inhbc         | 1.67  | 0.01 | -1.51 | 0.03 | 1.17   | 0.34 |
| Shmt1         | 1.75  | 0.08 | -1.49 | 0.00 | 1.79   | 0.01 |
| Serpina6      | 1.93  | 0.05 | -1.49 | 0.03 | -1.57  | 0.10 |
| Serpina7      | -4.35 | 0.00 | -1.48 | 0.03 | 1.30   | 0.18 |
| Uchl5         | 1.63  | 0.00 | -1.48 | 0.01 | 1.01   | 0.93 |
| Hsd17b7       | 1.93  | 0.00 | -1.47 | 0.02 | 2.18   | 0.02 |
| Gcdh          | 1.71  | 0.02 | -1.46 | 0.00 | 1.04   | 0.80 |
| Cyp8b1        | 2.45  | 0.00 | -1.46 | 0.08 | 4.86   | 0.01 |
| Ppm1l         | 1.54  | 0.07 | -1.46 | 0.01 | 1.57   | 0.02 |
| 1700001C19Rik | 2.12  | 0.00 | -1.46 | 0.01 | 1.48   | 0.09 |
| 2810055F11Rik | 1.60  | 0.06 | -1.45 | 0.00 | -1.01  | 0.96 |
| BC027088      | 1.78  | 0.05 | -1.45 | 0.02 | -1.04  | 0.84 |
| Lgals1        | -2.93 | 0.00 | -1.45 | 0.05 | -4.79  | 0.00 |
| Zkscan1       | 1.61  | 0.02 | -1.44 | 0.02 | 1.67   | 0.05 |
| Ugt2a3        | 2.24  | 0.00 | -1.44 | 0.00 | 1.12   | 0.47 |
| Hsd3b2        | 1.64  | 0.08 | -1.44 | 0.02 | -1.40  | 0.40 |
| Nnmt          | 2.17  | 0.11 | -1.44 | 0.42 | -1.03  | 0.94 |
| AA175286      | -2.13 | 0.01 | -1.43 | 0.03 | -1.36  | 0.09 |
| Afmid         | 2.12  | 0.00 | -1.43 | 0.00 | 1.24   | 0.36 |
| D9Wsu20e      | 1.88  | 0.00 | -1.42 | 0.03 | 1.23   | 0.22 |
| Adam11        | -1.91 | 0.00 | -1.42 | 0.01 | -2.35  | 0.01 |
| Ntn3          | 1.68  | 0.00 | -1.41 | 0.00 | 1.64   | 0.02 |
| 2310067E08Rik | -3.44 | 0.00 | -1.41 | 0.01 | -3.08  | 0.00 |
| Nit2          | 1.58  | 0.00 | -1.41 | 0.00 | 1.15   | 0.41 |

|               |       |      |       |      |       |      |
|---------------|-------|------|-------|------|-------|------|
| Avpr1a        | 3.75  | 0.00 | -1.40 | 0.08 | 2.38  | 0.01 |
| Dio1          | -1.60 | 0.10 | -1.40 | 0.16 | 1.81  | 0.01 |
| 1110025109Rik | 1.57  | 0.00 | -1.40 | 0.00 | 1.28  | 0.15 |
| Fbxo36        | 1.59  | 0.19 | -1.40 | 0.03 | 1.70  | 0.05 |
| 1100001G20Rik | 1.76  | 0.00 | -1.40 | 0.11 | 2.45  | 0.00 |
| Ly96          | 1.58  | 0.12 | -1.39 | 0.00 | -1.28 | 0.27 |
| 4833421E05Rik | 1.52  | 0.00 | -1.39 | 0.01 | 1.50  | 0.04 |
| Nox4          | 1.57  | 0.02 | -1.39 | 0.08 | 2.22  | 0.00 |
| Aldh1a7       | -1.70 | 0.01 | -1.39 | 0.00 | -2.58 | 0.00 |
| Mrps25        | 1.55  | 0.08 | -1.38 | 0.03 | -1.47 | 0.13 |
| Slc16a2       | 1.66  | 0.09 | -1.38 | 0.01 | -1.30 | 0.13 |
| Tmem86b       | 1.76  | 0.00 | -1.37 | 0.10 | -1.28 | 0.22 |
| Kremen        | 1.50  | 0.09 | -1.37 | 0.12 | -1.00 | 1.00 |
| Psen2         | 1.63  | 0.00 | -1.35 | 0.06 | -1.41 | 0.08 |
| Wdr51b        | 1.54  | 0.00 | -1.35 | 0.02 | -1.02 | 0.92 |
| AI317395      | 1.53  | 0.00 | -1.35 | 0.15 | 2.56  | 0.00 |
| 1700020C11Rik | 1.70  | 0.12 | -1.35 | 0.01 | 1.08  | 0.71 |
| Fhl1          | -1.56 | 0.10 | -1.35 | 0.01 | -1.28 | 0.18 |
| Hsd11b1       | 1.85  | 0.00 | -1.34 | 0.02 | 2.94  | 0.00 |
| Cyp4f14       | 1.96  | 0.03 | -1.34 | 0.01 | 2.08  | 0.07 |
| Pecr          | 2.00  | 0.00 | -1.34 | 0.03 | 1.54  | 0.03 |
| Slc10a1       | 2.17  | 0.05 | -1.34 | 0.11 | 4.20  | 0.00 |
| 3110057O12Rik | 1.56  | 0.08 | -1.34 | 0.01 | -1.14 | 0.40 |
| Gstm6         | 1.55  | 0.06 | -1.33 | 0.07 | -1.03 | 0.88 |
| Mnd1          | 1.58  | 0.01 | -1.33 | 0.04 | 1.16  | 0.40 |
| Aass          | 1.52  | 0.04 | -1.33 | 0.03 | 1.39  | 0.53 |
| Cxcl1         | -3.57 | 0.02 | -1.33 | 0.39 | 5.94  | 0.01 |
| Paqr9         | 1.60  | 0.11 | -1.32 | 0.06 | -1.05 | 0.85 |
| Mapt          | -2.20 | 0.00 | -1.32 | 0.01 | 1.02  | 0.90 |
| Tnfrsf11b     | -3.29 | 0.00 | -1.32 | 0.15 | 1.20  | 0.36 |
| Tubb2b        | -5.51 | 0.00 | -1.32 | 0.01 | 1.40  | 0.25 |
| Bach2         | 1.60  | 0.01 | -1.32 | 0.04 | -1.75 | 0.04 |
| Il1rap        | 1.71  | 0.00 | -1.31 | 0.02 | 1.68  | 0.02 |
| 3830422K02Rik | 1.63  | 0.01 | -1.31 | 0.02 | 1.04  | 0.92 |
| Irf1          | -1.54 | 0.19 | -1.31 | 0.07 | -1.05 | 0.77 |
| 2500002K03Rik | 1.52  | 0.20 | -1.31 | 0.00 | 1.11  | 0.55 |
| Extl1         | 4.70  | 0.00 | -1.30 | 0.29 | 6.82  | 0.00 |
| D19Wsu12e     | -1.68 | 0.00 | -1.30 | 0.01 | -1.39 | 0.19 |
| Ptp4a2        | 1.51  | 0.01 | -1.30 | 0.00 | -1.36 | 0.14 |
| Plcl2         | -1.92 | 0.00 | -1.29 | 0.09 | -1.46 | 0.09 |
| Gstm2         | -2.05 | 0.00 | -1.29 | 0.13 | -1.55 | 0.06 |
| Tmem49        | 1.74  | 0.09 | -1.28 | 0.00 | 1.08  | 0.65 |
| P2ry1         | 2.50  | 0.05 | -1.28 | 0.33 | -1.71 | 0.12 |
| D14Ert449e    | 3.01  | 0.00 | -1.28 | 0.02 | 1.22  | 0.23 |
| Dapk1         | 1.69  | 0.01 | -1.28 | 0.02 | -1.25 | 0.36 |
| 2310010G13Rik | 1.62  | 0.00 | -1.27 | 0.02 | 1.31  | 0.12 |
| Tpmt          | 1.62  | 0.18 | -1.27 | 0.01 | -1.05 | 0.77 |
| 2610318118Rik | 1.51  | 0.06 | -1.27 | 0.04 | 1.02  | 0.91 |
| 3110001H15Rik | 1.89  | 0.02 | -1.27 | 0.00 | 1.05  | 0.75 |
| Il1b          | -1.72 | 0.02 | -1.27 | 0.29 | -1.28 | 0.16 |
| Tfb1m         | 1.53  | 0.07 | -1.27 | 0.03 | 1.11  | 0.60 |
| Gpc4          | 2.10  | 0.00 | -1.27 | 0.00 | 1.28  | 0.15 |

|               |       |      |       |      |       |      |
|---------------|-------|------|-------|------|-------|------|
| Ccl25         | 1.65  | 0.01 | -1.27 | 0.01 | 1.28  | 0.24 |
| Rfx4          | 2.44  | 0.01 | -1.27 | 0.04 | 2.89  | 0.00 |
| Hist1h2ak     | -2.18 | 0.11 | -1.26 | 0.02 | -2.09 | 0.00 |
| Rnase4        | 1.77  | 0.08 | -1.26 | 0.13 | 1.57  | 0.11 |
| Rchy1         | 1.54  | 0.04 | -1.26 | 0.00 | 1.17  | 0.36 |
| Sardh         | 1.71  | 0.00 | -1.26 | 0.01 | -1.08 | 0.62 |
| Slc15a4       | 1.70  | 0.06 | -1.25 | 0.05 | -1.19 | 0.37 |
| S3-12         | -2.35 | 0.01 | -1.25 | 0.53 | -1.43 | 0.25 |
| 1200006F02Rik | 1.93  | 0.07 | -1.24 | 0.31 | 1.22  | 0.65 |
| Hbs1l         | 1.64  | 0.02 | -1.24 | 0.02 | 1.22  | 0.23 |
| Sfxn1         | -1.66 | 0.00 | -1.24 | 0.08 | -1.27 | 0.25 |
| Mgst3         | -3.46 | 0.00 | -1.24 | 0.33 | -1.19 | 0.29 |
| Lsm2          | 1.51  | 0.20 | -1.24 | 0.07 | -1.39 | 0.22 |
| Fgf1          | 1.74  | 0.01 | -1.23 | 0.24 | 5.20  | 0.00 |
| Ecsit         | 1.51  | 0.00 | -1.23 | 0.00 | 1.05  | 0.78 |
| Bmp1          | 1.67  | 0.00 | -1.23 | 0.07 | 1.54  | 0.06 |
| Pparg         | -3.13 | 0.00 | -1.23 | 0.07 | -2.73 | 0.00 |
| Timm9         | 1.69  | 0.00 | -1.22 | 0.06 | 1.26  | 0.20 |
| Pipox         | 1.77  | 0.00 | -1.22 | 0.05 | 1.15  | 0.38 |
| Nfe2l2        | -1.93 | 0.00 | -1.22 | 0.02 | -1.48 | 0.05 |
| Ifit3         | -1.77 | 0.13 | -1.22 | 0.11 | -1.46 | 0.10 |
| Rbm4          | 1.54  | 0.03 | -1.21 | 0.02 | -1.03 | 0.87 |
| 4930542G03Rik | -2.30 | 0.00 | -1.21 | 0.21 | -1.59 | 0.07 |
| Aadat         | 1.57  | 0.12 | -1.21 | 0.23 | -1.30 | 0.22 |
| Mospd3        | 1.84  | 0.00 | -1.21 | 0.09 | 1.15  | 0.44 |
| 2700082D03Rik | 1.56  | 0.00 | -1.21 | 0.01 | -1.12 | 0.49 |
| 2310061C15Rik | 1.53  | 0.19 | -1.20 | 0.00 | -1.11 | 0.51 |
| Vegfb         | -1.62 | 0.00 | -1.20 | 0.28 | 1.23  | 0.53 |
| Rorc          | 2.54  | 0.07 | -1.20 | 0.11 | 1.44  | 0.26 |
| Nthl1         | 1.95  | 0.05 | -1.20 | 0.00 | 1.08  | 0.76 |
| Plscr4        | -1.79 | 0.10 | -1.20 | 0.05 | -1.24 | 0.32 |
| Wdr21         | -2.63 | 0.04 | -1.20 | 0.30 | 1.35  | 0.38 |
| Tst           | 1.57  | 0.00 | -1.20 | 0.02 | -1.30 | 0.12 |
| Cdh2          | 1.59  | 0.06 | -1.20 | 0.01 | -1.02 | 0.92 |
| Cyp1a2        | 1.50  | 0.04 | -1.20 | 0.51 | 1.62  | 0.18 |
| Ift20         | 1.51  | 0.00 | -1.20 | 0.00 | -1.14 | 0.53 |
| Zap70         | 1.58  | 0.14 | -1.20 | 0.39 | -3.26 | 0.00 |
| 1110002N22Rik | 1.55  | 0.01 | -1.19 | 0.04 | 1.22  | 0.30 |
| Epha2         | 1.61  | 0.01 | -1.19 | 0.52 | 1.01  | 0.94 |
| Gbp2          | -3.26 | 0.13 | -1.19 | 0.11 | -1.06 | 0.70 |
| Clcn2         | 1.59  | 0.00 | -1.19 | 0.12 | 1.21  | 0.32 |
| Ftsj          | 1.59  | 0.13 | -1.19 | 0.04 | 1.21  | 0.25 |
| BC017612      | 1.82  | 0.00 | -1.19 | 0.44 | 1.63  | 0.03 |
| Pdzx          | 1.54  | 0.02 | -1.18 | 0.11 | 1.32  | 0.19 |
| Fxyd1         | 1.64  | 0.00 | -1.18 | 0.02 | 1.25  | 0.27 |
| 3110004L20Rik | 1.57  | 0.00 | -1.18 | 0.05 | 1.07  | 0.73 |
| Loh12cr1      | 1.67  | 0.04 | -1.18 | 0.11 | 1.66  | 0.02 |
| Arpc5         | -1.55 | 0.00 | -1.18 | 0.00 | -1.21 | 0.25 |
| Slc26a1       | 1.58  | 0.05 | -1.18 | 0.05 | -1.56 | 0.03 |
| Scnn1a        | 2.33  | 0.00 | -1.17 | 0.32 | 2.29  | 0.00 |
| Tk1           | 2.11  | 0.00 | -1.17 | 0.34 | -1.06 | 0.75 |
| Actr3         | -1.60 | 0.03 | -1.17 | 0.10 | -1.26 | 0.17 |

|               |       |      |       |      |       |      |
|---------------|-------|------|-------|------|-------|------|
| Tmem53        | 1.51  | 0.09 | -1.17 | 0.01 | -1.04 | 0.79 |
| BC026782      | 1.51  | 0.00 | -1.16 | 0.16 | 1.34  | 0.09 |
| Ceacam1       | 1.58  | 0.01 | -1.16 | 0.16 | 1.47  | 0.07 |
| Tnfaip2       | -1.92 | 0.15 | -1.16 | 0.22 | -1.72 | 0.02 |
| 1700123O20Rik | 1.55  | 0.09 | -1.16 | 0.01 | 1.33  | 0.15 |
| Lbh           | -1.94 | 0.04 | -1.16 | 0.24 | -3.44 | 0.00 |
| Slc22a7       | 2.97  | 0.06 | -1.16 | 0.24 | 1.35  | 0.12 |
| 9030607L17Rik | 1.99  | 0.08 | -1.16 | 0.09 | 1.01  | 0.97 |
| Trp53inp2     | 1.60  | 0.00 | -1.15 | 0.17 | 1.18  | 0.35 |
| Slc16a10      | 2.01  | 0.01 | -1.15 | 0.08 | 2.01  | 0.05 |
| D10Ucla2      | 1.84  | 0.00 | -1.15 | 0.27 | 1.62  | 0.02 |
| 2210021J22Rik | -2.45 | 0.05 | -1.15 | 0.26 | -1.74 | 0.06 |
| Zfand6        | 1.54  | 0.02 | -1.15 | 0.02 | 1.18  | 0.31 |
| Anp32a        | 1.74  | 0.00 | -1.15 | 0.15 | 1.57  | 0.04 |
| Pxmp2         | 1.51  | 0.00 | -1.15 | 0.05 | 1.15  | 0.47 |
| Smpd3a        | -1.50 | 0.02 | -1.14 | 0.14 | 1.15  | 0.44 |
| Tmem141       | 1.74  | 0.00 | -1.14 | 0.07 | -1.37 | 0.11 |
| Hist1h2af     | -2.20 | 0.14 | -1.14 | 0.19 | -1.86 | 0.01 |
| Slc25a13      | 2.11  | 0.00 | -1.14 | 0.09 | 1.31  | 0.14 |
| Paox          | 2.11  | 0.09 | -1.14 | 0.10 | 1.12  | 0.52 |
| 1810008A14Rik | 1.55  | 0.01 | -1.13 | 0.00 | -1.14 | 0.59 |
| Sqstm1        | -2.00 | 0.00 | -1.13 | 0.09 | -2.10 | 0.00 |
| Dyrk1a        | 1.69  | 0.16 | -1.13 | 0.19 | -1.18 | 0.37 |
| Atp5l         | 1.58  | 0.10 | -1.13 | 0.08 | -1.04 | 0.79 |
| Adcy9         | 1.57  | 0.06 | -1.13 | 0.19 | 1.53  | 0.03 |
| Gle1l         | 1.69  | 0.05 | -1.13 | 0.01 | 1.05  | 0.78 |
| Cd83          | -3.92 | 0.04 | -1.13 | 0.50 | -4.30 | 0.00 |
| BC025446      | 1.53  | 0.00 | -1.12 | 0.34 | 1.41  | 0.25 |
| Hrg           | 1.73  | 0.00 | -1.12 | 0.51 | 1.43  | 0.06 |
| Ctsc          | -1.79 | 0.00 | -1.12 | 0.26 | 2.05  | 0.01 |
| Hps3          | -1.53 | 0.04 | -1.12 | 0.14 | -1.09 | 0.62 |
| Agpat6        | 1.83  | 0.02 | -1.11 | 0.35 | -1.20 | 0.42 |
| Tax1bp3       | -1.80 | 0.00 | -1.11 | 0.30 | -1.39 | 0.13 |
| Mup4          | 5.87  | 0.06 | -1.11 | 0.69 | 1.10  | 0.57 |
| Hes6          | 1.97  | 0.21 | -1.11 | 0.53 | 1.13  | 0.71 |
| Oaf           | 1.69  | 0.01 | -1.10 | 0.14 | -1.19 | 0.43 |
| 2810405K02Rik | 1.80  | 0.12 | -1.10 | 0.35 | 1.30  | 0.25 |
| 2310004L02Rik | 1.82  | 0.00 | -1.10 | 0.36 | 1.93  | 0.01 |
| Egr2          | -8.80 | 0.04 | -1.10 | 0.78 | -4.25 | 0.00 |
| Ctnnb1        | 1.57  | 0.00 | -1.10 | 0.02 | 1.56  | 0.04 |
| Ywhah         | -1.58 | 0.00 | -1.10 | 0.10 | -2.10 | 0.01 |
| Abca6         | 1.50  | 0.01 | -1.09 | 0.27 | 1.70  | 0.01 |
| Sat2          | 1.72  | 0.00 | -1.09 | 0.19 | 1.27  | 0.17 |
| Cyp4f18       | -3.47 | 0.03 | -1.09 | 0.43 | 1.02  | 0.92 |
| Elmo1         | -3.30 | 0.00 | -1.09 | 0.50 | -1.40 | 0.26 |
| Papss1        | -1.60 | 0.02 | -1.09 | 0.30 | -1.21 | 0.36 |
| Gbp4          | -1.82 | 0.09 | -1.08 | 0.69 | 1.41  | 0.23 |
| Ndufa5        | 1.70  | 0.00 | -1.08 | 0.03 | -1.05 | 0.77 |
| 2310009E04Rik | 1.58  | 0.07 | -1.08 | 0.19 | 1.12  | 0.47 |
| Arpp19        | -2.03 | 0.00 | -1.08 | 0.22 | -1.27 | 0.20 |
| Ndrp2         | 1.56  | 0.02 | -1.08 | 0.06 | 1.20  | 0.28 |
| Cml1          | 1.68  | 0.00 | -1.08 | 0.46 | 1.31  | 0.31 |

|               |       |      |       |      |       |      |
|---------------|-------|------|-------|------|-------|------|
| Cap1          | 1.64  | 0.00 | -1.08 | 0.67 | 1.07  | 0.67 |
| Pole4         | 1.91  | 0.03 | -1.08 | 0.28 | 1.68  | 0.04 |
| Mbl1          | 1.73  | 0.04 | -1.08 | 0.45 | 1.19  | 0.29 |
| 2010323F13Rik | 1.72  | 0.00 | -1.08 | 0.28 | 1.22  | 0.24 |
| Pnpo          | 1.55  | 0.11 | -1.07 | 0.09 | -1.18 | 0.32 |
| 2810439F02Rik | 2.87  | 0.00 | -1.07 | 0.57 | -1.23 | 0.22 |
| 1110017O22Rik | 1.63  | 0.20 | -1.07 | 0.34 | -1.27 | 0.16 |
| Rps6ka1       | 1.52  | 0.00 | -1.07 | 0.10 | 1.57  | 0.09 |
| Igfbp5        | -1.61 | 0.04 | -1.06 | 0.79 | 1.26  | 0.48 |
| Hpn           | 1.67  | 0.00 | -1.06 | 0.45 | -1.04 | 0.80 |
| Large         | -1.55 | 0.02 | -1.06 | 0.60 | -1.17 | 0.32 |
| Nsun5         | 1.57  | 0.14 | -1.06 | 0.35 | 1.30  | 0.12 |
| B930041F14Rik | -9.09 | 0.00 | -1.06 | 0.85 | -2.47 | 0.01 |
| Rassf1        | -1.88 | 0.00 | -1.06 | 0.26 | -1.37 | 0.13 |
| Stk39         | -3.53 | 0.01 | -1.06 | 0.66 | -2.52 | 0.00 |
| Wdr1          | -1.55 | 0.01 | -1.06 | 0.27 | -1.59 | 0.03 |
| Znrd1         | 1.87  | 0.00 | -1.06 | 0.33 | -1.09 | 0.62 |
| Gpd2          | -1.50 | 0.01 | -1.06 | 0.50 | 1.35  | 0.26 |
| Ppap2b        | 1.61  | 0.06 | -1.06 | 0.47 | 1.29  | 0.20 |
| Rhobtb3       | 1.72  | 0.07 | -1.06 | 0.60 | 1.21  | 0.26 |
| Oasl1         | -1.63 | 0.00 | -1.06 | 0.68 | -1.40 | 0.11 |
| Fn3k          | 1.89  | 0.00 | -1.05 | 0.57 | 1.55  | 0.09 |
| Mrpl13        | 1.51  | 0.19 | -1.05 | 0.41 | -1.18 | 0.30 |
| Pank1         | 1.78  | 0.01 | -1.05 | 0.54 | 2.03  | 0.01 |
| Rgn           | 2.32  | 0.01 | -1.05 | 0.77 | 1.56  | 0.07 |
| Srebf2        | 1.81  | 0.01 | -1.05 | 0.37 | 1.48  | 0.09 |
| Slc13a3       | -1.85 | 0.11 | -1.05 | 0.55 | -1.36 | 0.13 |
| Hgfac         | 1.62  | 0.00 | -1.05 | 0.56 | 1.93  | 0.01 |
| Csrp3         | 1.98  | 0.00 | -1.05 | 0.82 | 3.36  | 0.00 |
| Arrdc2        | 1.66  | 0.03 | -1.04 | 0.33 | 1.85  | 0.01 |
| Shmt2         | 1.63  | 0.00 | -1.04 | 0.67 | 1.12  | 0.53 |
| 4632417N05Rik | 1.60  | 0.00 | -1.04 | 0.80 | 1.38  | 0.09 |
| Rbm3          | -1.67 | 0.02 | -1.03 | 0.58 | 1.22  | 0.52 |
| Ube1l         | -1.65 | 0.06 | -1.03 | 0.67 | -1.17 | 0.52 |
| Cav1          | 9.89  | 0.00 | -1.03 | 0.86 | -1.11 | 0.55 |
| Tnfrsf22      | -3.12 | 0.00 | -1.03 | 0.81 | 2.01  | 0.03 |
| 1500026D16Rik | 1.54  | 0.02 | -1.03 | 0.64 | 1.05  | 0.82 |
| Otud7b        | -2.36 | 0.17 | -1.03 | 0.79 | -1.93 | 0.01 |
| Npr2          | 2.09  | 0.00 | -1.03 | 0.58 | 1.26  | 0.19 |
| Grtp1         | 2.55  | 0.00 | -1.03 | 0.21 | 1.36  | 0.14 |
| Ube2q2        | 1.61  | 0.08 | -1.03 | 0.77 | 1.08  | 0.68 |
| Aldh8a1       | 1.78  | 0.17 | -1.02 | 0.74 | 1.28  | 0.14 |
| Adprh         | -1.52 | 0.04 | -1.02 | 0.79 | -1.37 | 0.08 |
| Hist1h2ao     | -2.23 | 0.15 | -1.02 | 0.85 | -2.80 | 0.00 |
| Oas1g         | -3.10 | 0.13 | -1.02 | 0.91 | 1.41  | 0.36 |
| 1810037G04Rik | 1.58  | 0.00 | -1.02 | 0.70 | 1.08  | 0.62 |
| Gulo          | 1.58  | 0.01 | -1.02 | 0.87 | -1.11 | 0.56 |
| Aadac         | 1.60  | 0.05 | -1.02 | 0.80 | 1.31  | 0.18 |
| Cyp2a12       | -2.33 | 0.00 | -1.02 | 0.67 | -1.21 | 0.24 |
| Cstb          | -1.85 | 0.01 | -1.02 | 0.84 | -2.19 | 0.00 |
| Eno1          | -1.61 | 0.00 | -1.01 | 0.94 | 1.34  | 0.13 |
| Plekha2       | -1.84 | 0.09 | -1.01 | 0.86 | -1.45 | 0.05 |



|               |       |      |       |      |       |      |
|---------------|-------|------|-------|------|-------|------|
| 1110018J18Rik | 1.60  | 0.20 | -1.01 | 0.89 | 1.13  | 0.46 |
| 4732475C15Rik | 1.83  | 0.11 | -1.01 | 0.82 | 1.21  | 0.26 |
| D11ErtD18e    | 1.53  | 0.00 | -1.01 | 0.84 | 1.06  | 0.75 |
| Pfdn2         | 1.55  | 0.06 | -1.01 | 0.84 | 1.11  | 0.51 |
| Tpd52l1       | 1.86  | 0.00 | -1.01 | 0.94 | -1.63 | 0.03 |
| Tm6sf2        | 1.67  | 0.00 | -1.01 | 0.90 | 1.79  | 0.01 |
| Cbr1          | -1.59 | 0.07 | -1.00 | 0.97 | -1.47 | 0.08 |
| Ndufb7        | 1.50  | 0.05 | -1.00 | 0.96 | -1.17 | 0.32 |
| Tubb5         | -2.11 | 0.00 | -1.00 | 0.99 | -3.12 | 0.00 |
| Dscr1         | -4.08 | 0.01 | -1.00 | 0.98 | 1.00  | 0.99 |
| Sdcbp         | -1.68 | 0.03 | -1.00 | 0.97 | -1.39 | 0.08 |
| Csf2ra        | -3.79 | 0.12 | -1.00 | 0.99 | -1.74 | 0.02 |
| Zw10          | 1.60  | 0.05 | -1.00 | 0.99 | 1.25  | 0.20 |
| BC049354      | -3.95 | 0.00 | -1.00 | 1.00 | -1.12 | 0.63 |
| Ear4          | -4.32 | 0.05 | -1.00 | 1.00 | -1.67 | 0.14 |
| Xlr4a         | 1.81  | 0.09 | -1.00 | 1.00 | -1.16 | 0.43 |
| 1300010A20Rik | 2.58  | 0.00 | 1.00  | 1.00 | 1.22  | 0.39 |
| Timp1         | -6.70 | 0.09 | 1.00  | 0.96 | -2.55 | 0.00 |
| Lias          | 1.57  | 0.08 | 1.00  | 0.95 | -1.02 | 0.91 |
| Zfp2          | 1.91  | 0.03 | 1.00  | 0.89 | 1.83  | 0.01 |
| P2ry14        | -2.26 | 0.00 | 1.00  | 0.95 | -1.31 | 0.12 |
| 2700038C09Rik | 1.53  | 0.01 | 1.00  | 0.94 | 1.07  | 0.66 |
| Mobkl2a       | -2.08 | 0.06 | 1.01  | 0.94 | -1.25 | 0.19 |
| Tnfrsf19      | -2.33 | 0.05 | 1.01  | 0.90 | -2.80 | 0.01 |
| Dgka          | 1.98  | 0.00 | 1.01  | 0.90 | 1.79  | 0.03 |
| Sorl1         | -4.42 | 0.00 | 1.01  | 0.91 | -1.71 | 0.02 |
| Al838661      | -2.15 | 0.00 | 1.01  | 0.83 | -1.11 | 0.58 |
| Vat1          | -1.69 | 0.00 | 1.01  | 0.90 | -1.30 | 0.19 |
| 1810020D17Rik | 1.50  | 0.01 | 1.01  | 0.89 | 1.36  | 0.18 |
| D10Bwg1364e   | -1.72 | 0.10 | 1.02  | 0.60 | 1.35  | 0.09 |
| 4930572J05Rik | -1.59 | 0.01 | 1.02  | 0.88 | -1.69 | 0.07 |
| 5730453H04Rik | -1.52 | 0.06 | 1.02  | 0.84 | -1.73 | 0.07 |
| Limk1         | -2.18 | 0.00 | 1.02  | 0.61 | -1.51 | 0.07 |
| Spp1          | -2.21 | 0.00 | 1.02  | 0.45 | -3.62 | 0.00 |
| Tgm2          | -2.70 | 0.00 | 1.02  | 0.36 | -2.65 | 0.00 |
| 2510006D16Rik | 1.66  | 0.00 | 1.02  | 0.65 | -1.08 | 0.65 |
| Cpn2          | 1.64  | 0.00 | 1.02  | 0.69 | 1.56  | 0.03 |
| Hspbap1       | -2.57 | 0.01 | 1.02  | 0.91 | -2.94 | 0.00 |
| Lgals3bp      | -1.69 | 0.00 | 1.03  | 0.63 | -1.50 | 0.04 |
| H2-DMa        | -3.13 | 0.20 | 1.03  | 0.74 | -1.20 | 0.42 |
| Polg2         | 1.55  | 0.05 | 1.03  | 0.59 | 1.21  | 0.32 |
| 4931440N07Rik | -6.63 | 0.00 | 1.03  | 0.72 | 1.53  | 0.03 |
| Pla1a         | 1.54  | 0.00 | 1.03  | 0.72 | 1.38  | 0.08 |
| Nudt7         | 2.02  | 0.13 | 1.03  | 0.87 | -1.34 | 0.26 |
| Map2k1        | 1.83  | 0.01 | 1.03  | 0.44 | 1.24  | 0.21 |
| ltpr2         | 1.81  | 0.00 | 1.03  | 0.75 | 1.15  | 0.41 |
| 1110028N05Rik | 1.55  | 0.02 | 1.04  | 0.50 | 1.22  | 0.25 |
| Gas6          | -2.52 | 0.00 | 1.04  | 0.73 | -1.79 | 0.02 |
| Lcp1          | -1.65 | 0.10 | 1.04  | 0.60 | -1.35 | 0.14 |
| BC065078      | 1.61  | 0.00 | 1.04  | 0.33 | -1.54 | 0.11 |
| Cyp7b1        | 5.07  | 0.00 | 1.04  | 0.92 | 1.38  | 0.29 |
| Igf1          | 1.76  | 0.00 | 1.04  | 0.29 | -1.59 | 0.02 |



|               |       |      |      |      |       |      |
|---------------|-------|------|------|------|-------|------|
| Sat1          | -1.94 | 0.00 | 1.04 | 0.64 | -2.06 | 0.00 |
| Cd44          | -1.82 | 0.04 | 1.04 | 0.70 | -2.62 | 0.00 |
| Abcc10        | 1.56  | 0.05 | 1.04 | 0.29 | 1.29  | 0.18 |
| Gng5          | 1.52  | 0.04 | 1.04 | 0.60 | -1.07 | 0.67 |
| Mcl1          | -1.55 | 0.00 | 1.04 | 0.47 | -1.37 | 0.16 |
| Hapln4        | 1.91  | 0.00 | 1.05 | 0.72 | 1.52  | 0.13 |
| Galnt10       | -1.78 | 0.00 | 1.05 | 0.62 | -2.10 | 0.01 |
| Usp20         | -1.63 | 0.00 | 1.05 | 0.44 | -1.74 | 0.01 |
| Hpd           | 1.60  | 0.00 | 1.05 | 0.66 | 1.28  | 0.33 |
| Entpd8        | 1.75  | 0.01 | 1.05 | 0.39 | 1.39  | 0.08 |
| Fchsd1        | -2.94 | 0.01 | 1.05 | 0.43 | -2.20 | 0.00 |
| H2-M3         | -2.20 | 0.00 | 1.05 | 0.72 | -1.36 | 0.13 |
| Plg           | 1.64  | 0.00 | 1.05 | 0.37 | 1.21  | 0.27 |
| Anapc5        | -1.52 | 0.05 | 1.05 | 0.28 | -1.41 | 0.07 |
| Hn1           | -1.93 | 0.00 | 1.05 | 0.32 | -1.66 | 0.03 |
| Tpd52         | -2.13 | 0.00 | 1.05 | 0.33 | -1.14 | 0.42 |
| Asgr2         | 1.54  | 0.00 | 1.06 | 0.17 | 1.25  | 0.20 |
| 5033414D02Rik | -1.63 | 0.04 | 1.06 | 0.35 | -1.98 | 0.02 |
| Slc25a42      | 1.79  | 0.00 | 1.06 | 0.60 | 1.35  | 0.18 |
| Chchd7        | 1.52  | 0.00 | 1.06 | 0.28 | 2.06  | 0.01 |
| Pltp          | -1.95 | 0.00 | 1.06 | 0.68 | 4.08  | 0.00 |
| D14Ert668e    | -2.55 | 0.08 | 1.07 | 0.14 | -1.01 | 0.95 |
| Kng2          | 1.50  | 0.00 | 1.07 | 0.56 | 2.13  | 0.00 |
| Slco2a1       | -1.67 | 0.00 | 1.07 | 0.10 | 1.86  | 0.02 |
| Faah          | 1.62  | 0.16 | 1.07 | 0.45 | 1.52  | 0.04 |
| Actb          | -1.82 | 0.00 | 1.07 | 0.38 | 1.05  | 0.78 |
| Nap111        | -2.00 | 0.00 | 1.07 | 0.12 | -1.03 | 0.88 |
| Cd40          | -2.22 | 0.18 | 1.07 | 0.73 | -1.51 | 0.03 |
| Atpaf2        | 1.78  | 0.08 | 1.07 | 0.10 | -1.03 | 0.86 |
| BC030183      | 2.41  | 0.00 | 1.08 | 0.08 | 1.00  | 1.00 |
| Tmem43        | -2.55 | 0.00 | 1.08 | 0.62 | -2.61 | 0.00 |
| Tgfbr1        | -1.53 | 0.02 | 1.08 | 0.05 | -1.38 | 0.08 |
| Alg9          | 1.66  | 0.15 | 1.08 | 0.14 | -1.12 | 0.60 |
| Setd8         | -1.49 | 0.06 | 1.08 | 0.62 | -2.13 | 0.03 |
| Bat4          | 1.71  | 0.17 | 1.08 | 0.34 | -1.32 | 0.20 |
| Plscr1        | -2.13 | 0.00 | 1.08 | 0.34 | -1.45 | 0.11 |
| Slpi          | -2.63 | 0.07 | 1.08 | 0.81 | -2.30 | 0.00 |
| Gjb1          | 1.89  | 0.01 | 1.08 | 0.60 | 1.44  | 0.05 |
| Stxbp2        | -1.52 | 0.00 | 1.08 | 0.39 | 1.70  | 0.02 |
| Hk3           | -3.04 | 0.00 | 1.09 | 0.39 | -1.45 | 0.16 |
| Phf11         | -3.85 | 0.08 | 1.09 | 0.30 | -1.01 | 0.95 |
| Lpxn          | -3.47 | 0.01 | 1.09 | 0.28 | -1.96 | 0.01 |
| Kcnn2         | 1.85  | 0.03 | 1.09 | 0.46 | 1.72  | 0.02 |
| Mapre2        | -1.85 | 0.00 | 1.09 | 0.21 | -1.13 | 0.65 |
| A430005L14Rik | 1.66  | 0.00 | 1.09 | 0.20 | 1.28  | 0.16 |
| Lig1          | -1.95 | 0.01 | 1.09 | 0.09 | -1.50 | 0.04 |
| Hspb1         | -2.14 | 0.00 | 1.10 | 0.51 | -2.09 | 0.01 |
| Rgl1          | -1.69 | 0.02 | 1.10 | 0.10 | -1.82 | 0.05 |
| Zfp691        | 1.96  | 0.14 | 1.10 | 0.14 | -1.03 | 0.90 |
| Tpcn2         | -2.35 | 0.01 | 1.10 | 0.17 | 1.31  | 0.17 |
| Psmc8         | -1.63 | 0.00 | 1.10 | 0.07 | -1.26 | 0.21 |
| Tnfaip3       | -4.63 | 0.00 | 1.10 | 0.37 | -1.27 | 0.23 |

|               |       |      |      |      |        |      |
|---------------|-------|------|------|------|--------|------|
| 5930434B04Rik | 1.54  | 0.05 | 1.10 | 0.06 | 1.11   | 0.59 |
| Slc29a1       | 1.73  | 0.00 | 1.10 | 0.30 | 1.47   | 0.09 |
| Arhgap17      | -1.75 | 0.00 | 1.11 | 0.10 | -1.40  | 0.07 |
| AA960558      | -2.41 | 0.00 | 1.11 | 0.40 | -1.64  | 0.02 |
| Sesn1         | -1.55 | 0.01 | 1.11 | 0.27 | 1.25   | 0.20 |
| Heatr1        | 1.73  | 0.00 | 1.12 | 0.25 | 1.41   | 0.14 |
| Scarb1        | 1.97  | 0.00 | 1.12 | 0.28 | 1.16   | 0.41 |
| Pgd           | -1.99 | 0.00 | 1.12 | 0.24 | -2.32  | 0.00 |
| Lst1          | -1.91 | 0.01 | 1.12 | 0.19 | -1.65  | 0.06 |
| 2310008H09Rik | 1.71  | 0.16 | 1.12 | 0.09 | -1.07  | 0.67 |
| Lcat          | 1.54  | 0.00 | 1.12 | 0.35 | 2.34   | 0.46 |
| Fcna          | 1.84  | 0.00 | 1.12 | 0.51 | -1.60  | 0.03 |
| Nostrin       | 1.51  | 0.08 | 1.12 | 0.16 | 1.42   | 0.07 |
| Parp16        | 1.92  | 0.03 | 1.12 | 0.26 | 1.47   | 0.27 |
| 4933422H20Rik | 2.43  | 0.03 | 1.12 | 0.28 | -1.07  | 0.77 |
| Asah1         | -1.71 | 0.01 | 1.12 | 0.10 | 1.00   | 0.99 |
| Gnb1          | -1.69 | 0.00 | 1.12 | 0.14 | -1.54  | 0.03 |
| Kctd12        | -4.09 | 0.00 | 1.12 | 0.01 | -1.10  | 0.60 |
| Csnk1e        | -1.73 | 0.05 | 1.12 | 0.19 | -2.25  | 0.00 |
| Slc8a1        | -2.72 | 0.08 | 1.12 | 0.20 | -1.07  | 0.67 |
| Ubd           | -8.51 | 0.04 | 1.13 | 0.74 | -22.07 | 0.00 |
| 4732429D16Rik | -1.67 | 0.09 | 1.13 | 0.29 | -1.08  | 0.73 |
| Hk2           | -5.03 | 0.00 | 1.13 | 0.15 | -2.48  | 0.00 |
| Grina         | -1.51 | 0.00 | 1.13 | 0.40 | 1.55   | 0.03 |
| Ctps          | -1.63 | 0.17 | 1.13 | 0.01 | -1.87  | 0.02 |
| Gstm4         | -1.51 | 0.01 | 1.14 | 0.06 | 1.11   | 0.60 |
| Cd163         | 2.79  | 0.11 | 1.14 | 0.44 | 7.12   | 0.00 |
| St3gal3       | 1.72  | 0.10 | 1.14 | 0.59 | 1.44   | 0.05 |
| Gpx4          | -1.74 | 0.00 | 1.14 | 0.16 | -1.62  | 0.03 |
| Ets2          | -1.80 | 0.00 | 1.14 | 0.02 | -1.29  | 0.29 |
| H2-Eb1        | -3.81 | 0.18 | 1.14 | 0.30 | -1.94  | 0.01 |
| 9130211I03Rik | -2.81 | 0.01 | 1.14 | 0.28 | -2.80  | 0.01 |
| Rhou          | -1.68 | 0.00 | 1.14 | 0.26 | -1.51  | 0.08 |
| Tpm3          | -1.61 | 0.00 | 1.14 | 0.01 | -1.38  | 0.10 |
| Ccl4          | -9.55 | 0.00 | 1.15 | 0.62 | -5.64  | 0.00 |
| Tnfaip8       | -1.97 | 0.10 | 1.15 | 0.40 | -1.40  | 0.09 |
| Ly86          | -3.01 | 0.00 | 1.15 | 0.23 | -1.89  | 0.01 |
| Gpld1         | 1.77  | 0.00 | 1.15 | 0.15 | 1.31   | 0.20 |
| Anxa3         | -2.61 | 0.02 | 1.15 | 0.24 | -2.50  | 0.00 |
| 2610024G14Rik | 1.50  | 0.17 | 1.15 | 0.08 | -1.20  | 0.37 |
| Casp6         | -1.50 | 0.05 | 1.15 | 0.30 | 1.22   | 0.22 |
| Alcam         | -1.70 | 0.00 | 1.15 | 0.15 | -1.87  | 0.02 |
| A330080J22Rik | 1.59  | 0.20 | 1.15 | 0.11 | -1.05  | 0.76 |
| Ggcx          | 1.56  | 0.06 | 1.16 | 0.04 | 1.30   | 0.13 |
| 1700022C21Rik | 1.60  | 0.01 | 1.16 | 0.07 | -1.09  | 0.62 |
| Prelp         | -1.61 | 0.00 | 1.16 | 0.03 | -1.63  | 0.06 |
| Fabp3         | 10.52 | 0.00 | 1.16 | 0.47 | -1.83  | 0.02 |
| 6330505F04Rik | -1.59 | 0.06 | 1.16 | 0.09 | -1.52  | 0.04 |
| Dok2          | -2.57 | 0.01 | 1.16 | 0.35 | -1.76  | 0.02 |
| Gadd45a       | -2.11 | 0.09 | 1.17 | 0.49 | -1.59  | 0.16 |
| Nfkbiz        | -1.68 | 0.01 | 1.17 | 0.42 | 1.58   | 0.06 |
| 1110012E06Rik | -1.70 | 0.05 | 1.17 | 0.00 | -1.39  | 0.25 |

|               |       |      |      |      |       |      |
|---------------|-------|------|------|------|-------|------|
| Il3ra         | -1.89 | 0.05 | 1.18 | 0.05 | -1.06 | 0.75 |
| A830007P12Rik | -1.61 | 0.09 | 1.18 | 0.05 | -1.07 | 0.68 |
| Ephx1         | -2.15 | 0.00 | 1.18 | 0.18 | -1.30 | 0.19 |
| Clec4a3       | -2.21 | 0.04 | 1.18 | 0.18 | -1.16 | 0.53 |
| Wtip          | -1.56 | 0.01 | 1.18 | 0.05 | -1.44 | 0.05 |
| 5730593N15Rik | 2.03  | 0.00 | 1.18 | 0.13 | -1.02 | 0.96 |
| Mmp14         | -1.72 | 0.02 | 1.18 | 0.03 | 1.17  | 0.51 |
| Mylc2b        | -1.76 | 0.00 | 1.18 | 0.03 | -1.61 | 0.02 |
| Pla2g12a      | -1.61 | 0.01 | 1.18 | 0.06 | 1.56  | 0.04 |
| Rasgrp1       | -2.57 | 0.03 | 1.18 | 0.12 | -1.04 | 0.84 |
| Ptprs         | -1.82 | 0.00 | 1.19 | 0.09 | -2.35 | 0.00 |
| Kif1b         | 1.59  | 0.09 | 1.19 | 0.16 | -1.08 | 0.69 |
| A130092J06Rik | -1.93 | 0.00 | 1.19 | 0.07 | -1.43 | 0.14 |
| Tm4sf4        | -1.97 | 0.08 | 1.19 | 0.34 | -2.38 | 0.00 |
| Tuba1a        | -1.52 | 0.01 | 1.19 | 0.21 | -2.45 | 0.00 |
| Mrps5         | 1.58  | 0.01 | 1.19 | 0.00 | 1.31  | 0.12 |
| Khdrbs1       | -1.49 | 0.06 | 1.20 | 0.16 | -1.08 | 0.63 |
| Ccr5          | -3.00 | 0.17 | 1.20 | 0.11 | -1.51 | 0.21 |
| Marcks        | -2.28 | 0.00 | 1.20 | 0.17 | -1.99 | 0.01 |
| Tmem8         | 1.51  | 0.18 | 1.20 | 0.01 | -1.22 | 0.28 |
| Rgl2          | -1.56 | 0.01 | 1.20 | 0.01 | -1.22 | 0.26 |
| Cpt1b         | -2.28 | 0.00 | 1.20 | 0.09 | 1.97  | 0.10 |
| Tnfrsf11a     | -4.00 | 0.04 | 1.20 | 0.24 | -1.24 | 0.28 |
| 2610027L16Rik | 1.61  | 0.12 | 1.20 | 0.01 | 1.01  | 0.96 |
| Pqbp1         | 1.83  | 0.05 | 1.20 | 0.05 | 1.15  | 0.40 |
| Al415330      | 1.54  | 0.04 | 1.20 | 0.09 | 3.01  | 0.00 |
| Slc39a6       | -1.61 | 0.19 | 1.21 | 0.04 | -1.18 | 0.33 |
| Cryl1         | -1.56 | 0.00 | 1.21 | 0.26 | -1.52 | 0.09 |
| Apobec1       | -1.73 | 0.00 | 1.21 | 0.01 | -1.45 | 0.05 |
| D12Ert553e    | -1.55 | 0.07 | 1.21 | 0.04 | -1.23 | 0.22 |
| 2310005E10Rik | -1.84 | 0.02 | 1.21 | 0.04 | -1.51 | 0.13 |
| Plvap         | -1.50 | 0.00 | 1.21 | 0.02 | -1.32 | 0.13 |
| Gusb          | -1.66 | 0.00 | 1.21 | 0.00 | 1.17  | 0.34 |
| Laptm5        | -2.73 | 0.00 | 1.21 | 0.12 | -1.90 | 0.02 |
| Plk2          | -2.00 | 0.01 | 1.22 | 0.12 | -2.22 | 0.01 |
| BC013712      | -2.45 | 0.03 | 1.22 | 0.13 | -1.83 | 0.02 |
| Dcn           | -1.67 | 0.00 | 1.22 | 0.02 | -1.78 | 0.01 |
| Spnb2         | -1.70 | 0.04 | 1.22 | 0.01 | -1.20 | 0.30 |
| Frrs1         | -1.81 | 0.00 | 1.22 | 0.05 | -1.44 | 0.07 |
| Papss2        | 1.65  | 0.06 | 1.22 | 0.30 | 1.27  | 0.19 |
| Ccnd3         | 1.65  | 0.01 | 1.22 | 0.06 | 1.37  | 0.08 |
| Ptpn18        | -2.95 | 0.13 | 1.22 | 0.22 | -2.31 | 0.01 |
| Pddc1         | 1.79  | 0.16 | 1.23 | 0.06 | -1.05 | 0.80 |
| AY078069      | -2.84 | 0.12 | 1.23 | 0.38 | -1.36 | 0.09 |
| Oas2          | -3.21 | 0.00 | 1.23 | 0.06 | -1.64 | 0.04 |
| Cml2          | 1.93  | 0.01 | 1.23 | 0.17 | 1.22  | 0.24 |
| Gngt2         | -2.31 | 0.02 | 1.23 | 0.14 | -1.40 | 0.20 |
| Snn           | -2.16 | 0.00 | 1.23 | 0.11 | -1.43 | 0.05 |
| Ear10         | -3.68 | 0.04 | 1.23 | 0.14 | -1.46 | 0.09 |
| Znrf1         | 1.55  | 0.12 | 1.23 | 0.01 | 1.12  | 0.49 |
| Irf5          | -1.89 | 0.08 | 1.24 | 0.05 | -1.77 | 0.15 |
| Ifit2         | -3.65 | 0.00 | 1.24 | 0.07 | -1.25 | 0.24 |

|               |        |      |      |      |       |      |
|---------------|--------|------|------|------|-------|------|
| Lmna          | -1.52  | 0.01 | 1.24 | 0.04 | -1.70 | 0.02 |
| Cd86          | -2.35  | 0.00 | 1.24 | 0.09 | -1.01 | 0.95 |
| Htatif2       | -1.56  | 0.00 | 1.24 | 0.09 | -1.28 | 0.16 |
| C9            | -1.93  | 0.01 | 1.24 | 0.13 | 1.02  | 0.95 |
| Sec14l4       | 1.74   | 0.09 | 1.24 | 0.01 | 1.21  | 0.41 |
| Cyp17a1       | -2.98  | 0.02 | 1.24 | 0.38 | 1.15  | 0.70 |
| Trit1         | 1.58   | 0.00 | 1.24 | 0.03 | -1.32 | 0.21 |
| Slc24a3       | -3.35  | 0.00 | 1.24 | 0.15 | -2.63 | 0.00 |
| Ehd4          | -1.98  | 0.01 | 1.24 | 0.06 | -1.29 | 0.18 |
| Zfp90         | -2.13  | 0.00 | 1.24 | 0.10 | -1.94 | 0.01 |
| Nt5c2         | -1.83  | 0.07 | 1.25 | 0.02 | 1.43  | 0.13 |
| Kif3a         | -1.50  | 0.09 | 1.25 | 0.17 | -1.51 | 0.11 |
| Il15ra        | 1.57   | 0.06 | 1.25 | 0.03 | 2.17  | 0.00 |
| Aif1          | -2.36  | 0.00 | 1.25 | 0.13 | -2.43 | 0.04 |
| Als2cr4       | -2.13  | 0.00 | 1.25 | 0.05 | -2.32 | 0.00 |
| Oasl2         | -2.78  | 0.13 | 1.26 | 0.01 | -1.78 | 0.03 |
| Sh3kbp1       | -2.25  | 0.15 | 1.26 | 0.07 | -1.87 | 0.02 |
| Spc25         | 2.17   | 0.00 | 1.26 | 0.14 | -1.29 | 0.24 |
| Mrps2         | 1.56   | 0.01 | 1.26 | 0.00 | 1.15  | 0.49 |
| Plcg2         | -2.34  | 0.02 | 1.26 | 0.01 | -1.61 | 0.08 |
| Lrp11         | -1.84  | 0.19 | 1.26 | 0.16 | -1.61 | 0.04 |
| Ephb2         | -11.09 | 0.00 | 1.26 | 0.55 | -5.16 | 0.00 |
| Lilrb4        | -4.18  | 0.00 | 1.27 | 0.02 | -1.66 | 0.04 |
| Zfp289        | 1.53   | 0.00 | 1.27 | 0.03 | 1.21  | 0.26 |
| Adrbk1        | -1.52  | 0.00 | 1.27 | 0.01 | -1.37 | 0.15 |
| Trem14        | -2.19  | 0.04 | 1.27 | 0.15 | -2.01 | 0.01 |
| F7            | 2.06   | 0.00 | 1.27 | 0.01 | 1.90  | 0.01 |
| Abca8a        | 1.79   | 0.00 | 1.27 | 0.06 | 1.42  | 0.06 |
| Tspan31       | 1.87   | 0.00 | 1.27 | 0.04 | -1.50 | 0.04 |
| Rab8b         | -2.63  | 0.05 | 1.28 | 0.10 | -1.11 | 0.52 |
| Fcgr3         | -2.42  | 0.17 | 1.28 | 0.01 | -1.17 | 0.33 |
| Tinagl        | -1.52  | 0.06 | 1.28 | 0.01 | -1.07 | 0.68 |
| Vsig4         | -1.86  | 0.00 | 1.28 | 0.02 | 1.51  | 0.07 |
| Tnfrsf21      | -1.56  | 0.16 | 1.28 | 0.04 | -1.61 | 0.03 |
| Trpt1         | 1.53   | 0.04 | 1.28 | 0.00 | 1.64  | 0.04 |
| Tmsb4x        | -2.24  | 0.00 | 1.28 | 0.11 | -2.37 | 0.01 |
| Cotl1         | -2.70  | 0.01 | 1.28 | 0.14 | -3.04 | 0.00 |
| Cerk          | -2.40  | 0.01 | 1.29 | 0.05 | -1.14 | 0.62 |
| Col14a1       | -1.53  | 0.12 | 1.29 | 0.03 | -1.48 | 0.10 |
| Cxcl16        | -2.66  | 0.00 | 1.29 | 0.01 | -1.82 | 0.02 |
| 2700029E10Rik | 2.53   | 0.00 | 1.29 | 0.10 | -1.92 | 0.01 |
| Arhgap25      | -5.21  | 0.00 | 1.29 | 0.09 | -2.37 | 0.00 |
| Gpr65         | -2.95  | 0.12 | 1.29 | 0.04 | -1.67 | 0.04 |
| Fcgr1         | -4.20  | 0.03 | 1.29 | 0.10 | -1.83 | 0.05 |
| 2810022L02Rik | -3.73  | 0.01 | 1.29 | 0.01 | -1.24 | 0.25 |
| Slc35c2       | -1.49  | 0.08 | 1.30 | 0.06 | -1.30 | 0.20 |
| Arhgap30      | -2.22  | 0.09 | 1.30 | 0.02 | -2.02 | 0.01 |
| Mast2         | -1.50  | 0.01 | 1.30 | 0.00 | -1.64 | 0.02 |
| Cmtm7         | -2.04  | 0.01 | 1.30 | 0.03 | -1.76 | 0.01 |
| 9330129D05Rik | -2.79  | 0.00 | 1.30 | 0.06 | -1.87 | 0.01 |
| Rac2          | -3.08  | 0.04 | 1.30 | 0.01 | -1.79 | 0.03 |
| Fez2          | -1.55  | 0.00 | 1.30 | 0.01 | -1.02 | 0.92 |

|               |       |      |      |      |       |      |
|---------------|-------|------|------|------|-------|------|
| Al604832      | -1.65 | 0.01 | 1.30 | 0.01 | 1.02  | 0.89 |
| ldh2          | -1.51 | 0.00 | 1.30 | 0.07 | -1.46 | 0.06 |
| AA691260      | 1.88  | 0.08 | 1.30 | 0.00 | -1.14 | 0.41 |
| 1200002N14Rik | -3.20 | 0.04 | 1.30 | 0.02 | -1.86 | 0.01 |
| Oxct1         | -2.35 | 0.05 | 1.30 | 0.02 | -2.45 | 0.00 |
| Timm10        | 1.84  | 0.00 | 1.30 | 0.01 | 1.00  | 1.00 |
| Evi2a         | -4.54 | 0.01 | 1.30 | 0.15 | -1.81 | 0.01 |
| Arrb2         | -1.63 | 0.01 | 1.31 | 0.01 | -1.23 | 0.30 |
| 4432409M07Rik | -1.83 | 0.07 | 1.31 | 0.01 | -2.07 | 0.01 |
| Anxa5         | -3.24 | 0.00 | 1.31 | 0.09 | -3.34 | 0.00 |
| 2410016O06Rik | 1.54  | 0.10 | 1.31 | 0.02 | -1.03 | 0.85 |
| Fpr-rs2       | -4.09 | 0.00 | 1.31 | 0.09 | 1.29  | 0.22 |
| Pde1b         | -1.62 | 0.05 | 1.31 | 0.01 | -1.10 | 0.59 |
| Gprk6         | -1.87 | 0.13 | 1.31 | 0.01 | -1.02 | 0.91 |
| Pea15         | -2.12 | 0.00 | 1.32 | 0.04 | -2.32 | 0.01 |
| Capn10        | 1.94  | 0.00 | 1.32 | 0.01 | 2.13  | 0.01 |
| Fcer1g        | -2.87 | 0.02 | 1.32 | 0.03 | -1.94 | 0.01 |
| Abhd1         | 1.75  | 0.04 | 1.32 | 0.03 | 2.04  | 0.04 |
| 9030625A04Rik | -1.74 | 0.01 | 1.32 | 0.02 | -1.59 | 0.04 |
| Mgat4b        | -1.49 | 0.00 | 1.32 | 0.05 | -1.54 | 0.04 |
| Dnajc12       | 1.75  | 0.20 | 1.32 | 0.16 | 3.09  | 0.00 |
| Pdlim4        | -2.24 | 0.00 | 1.32 | 0.05 | -2.51 | 0.01 |
| Unc93b1       | -1.58 | 0.01 | 1.32 | 0.00 | -1.49 | 0.10 |
| AA536743      | -1.64 | 0.04 | 1.33 | 0.08 | -1.59 | 0.03 |
| 1110063F24Rik | -2.73 | 0.00 | 1.33 | 0.01 | -1.09 | 0.66 |
| Cd52          | -4.82 | 0.01 | 1.35 | 0.07 | -2.53 | 0.01 |
| Srd5a2l       | -1.67 | 0.02 | 1.35 | 0.03 | -1.14 | 0.43 |
| 2510048K03Rik | -1.98 | 0.00 | 1.35 | 0.00 | -1.29 | 0.15 |
| Tm6sf1        | -4.42 | 0.04 | 1.35 | 0.02 | -1.16 | 0.38 |
| BC022145      | -2.06 | 0.19 | 1.36 | 0.00 | -1.53 | 0.12 |
| Jun           | -2.85 | 0.00 | 1.36 | 0.22 | -1.76 | 0.19 |
| BC003236      | -2.06 | 0.07 | 1.36 | 0.00 | 1.07  | 0.70 |
| Slc12a7       | 1.51  | 0.12 | 1.37 | 0.00 | -1.19 | 0.52 |
| Cxcl4         | -2.95 | 0.09 | 1.37 | 0.04 | -1.87 | 0.01 |
| Myh9          | -1.66 | 0.00 | 1.37 | 0.03 | -2.15 | 0.00 |
| 2510009E07Rik | -1.58 | 0.00 | 1.37 | 0.00 | -2.20 | 0.00 |
| 1700023M03Rik | -2.05 | 0.02 | 1.37 | 0.10 | -1.69 | 0.01 |
| Dok3          | -1.60 | 0.01 | 1.37 | 0.00 | -1.16 | 0.37 |
| Hmox1         | -1.74 | 0.08 | 1.38 | 0.11 | -1.34 | 0.41 |
| Tnip1         | -2.17 | 0.00 | 1.38 | 0.01 | -1.95 | 0.01 |
| Spon2         | -2.16 | 0.10 | 1.38 | 0.35 | -2.53 | 0.00 |
| Lgals3        | -6.05 | 0.00 | 1.38 | 0.07 | -3.00 | 0.00 |
| Npc2          | -1.50 | 0.00 | 1.38 | 0.00 | -1.02 | 0.91 |
| Sh3tc1        | -1.75 | 0.00 | 1.38 | 0.01 | 1.10  | 0.59 |
| Ikbke         | -1.56 | 0.03 | 1.38 | 0.00 | 1.04  | 0.84 |
| Aqp11         | 2.06  | 0.05 | 1.39 | 0.00 | 1.35  | 0.10 |
| P2ry13        | -1.87 | 0.02 | 1.39 | 0.02 | -1.13 | 0.67 |
| Rgs10         | -2.51 | 0.13 | 1.39 | 0.02 | -2.39 | 0.00 |
| Ckb           | -2.23 | 0.00 | 1.39 | 0.05 | -3.87 | 0.00 |
| Fgd2          | -2.66 | 0.00 | 1.40 | 0.01 | -1.59 | 0.09 |
| Glt25d1       | -1.69 | 0.00 | 1.40 | 0.00 | -1.33 | 0.11 |
| 1810055G02Rik | 1.74  | 0.00 | 1.40 | 0.07 | 1.76  | 0.04 |

|               |        |      |      |      |       |      |
|---------------|--------|------|------|------|-------|------|
| Cd97          | -1.55  | 0.19 | 1.40 | 0.00 | -1.36 | 0.13 |
| Tmem176a      | -1.96  | 0.00 | 1.40 | 0.00 | -1.62 | 0.02 |
| Apcs          | -1.54  | 0.00 | 1.40 | 0.12 | 2.11  | 0.01 |
| Asb2          | -3.83  | 0.11 | 1.40 | 0.09 | -2.36 | 0.01 |
| C230090D14    | -3.66  | 0.00 | 1.41 | 0.01 | -1.59 | 0.04 |
| Crtap         | -1.67  | 0.02 | 1.41 | 0.00 | -1.54 | 0.04 |
| Ppfbp1        | -1.92  | 0.06 | 1.41 | 0.05 | -1.16 | 0.41 |
| BC049975      | -2.18  | 0.11 | 1.41 | 0.01 | 2.38  | 0.00 |
| Prkcz         | 1.55   | 0.00 | 1.41 | 0.00 | 1.56  | 0.03 |
| Gpr109a       | 105.50 | 0.04 | 1.41 | 0.19 | -1.21 | 0.66 |
| Dapk2         | -1.63  | 0.00 | 1.41 | 0.09 | -1.32 | 0.23 |
| Pdlim7        | -1.77  | 0.02 | 1.41 | 0.03 | -1.32 | 0.11 |
| Serpina1c     | 1.53   | 0.00 | 1.41 | 0.02 | 1.21  | 0.26 |
| Dscr1l2       | -2.08  | 0.00 | 1.42 | 0.00 | -1.15 | 0.43 |
| 5430435G22Rik | -3.16  | 0.07 | 1.42 | 0.09 | -3.86 | 0.00 |
| Pip5k2a       | -2.04  | 0.00 | 1.42 | 0.00 | -1.48 | 0.14 |
| Nxn           | -1.58  | 0.01 | 1.42 | 0.01 | -1.55 | 0.03 |
| Sort1         | -2.84  | 0.00 | 1.42 | 0.05 | 1.09  | 0.79 |
| Rassf4        | -2.51  | 0.00 | 1.42 | 0.00 | -1.52 | 0.05 |
| Emr1          | -3.29  | 0.00 | 1.42 | 0.05 | -1.64 | 0.04 |
| C8b           | 2.90   | 0.01 | 1.42 | 0.03 | 1.05  | 0.74 |
| Tgfb1         | -1.94  | 0.09 | 1.42 | 0.01 | -1.51 | 0.06 |
| Ly9           | -2.81  | 0.14 | 1.43 | 0.03 | -1.44 | 0.05 |
| Treh          | -6.55  | 0.00 | 1.43 | 0.11 | -1.82 | 0.06 |
| Prkcb         | -2.49  | 0.05 | 1.43 | 0.00 | -1.42 | 0.14 |
| Nid1          | -2.96  | 0.00 | 1.43 | 0.01 | -2.52 | 0.00 |
| Zkscan17      | 1.64   | 0.09 | 1.44 | 0.00 | 1.22  | 0.24 |
| Slc2a8        | 1.58   | 0.05 | 1.44 | 0.00 | 1.42  | 0.06 |
| Ncf4          | -2.90  | 0.00 | 1.45 | 0.03 | -2.11 | 0.00 |
| Elovl1        | -1.65  | 0.00 | 1.45 | 0.00 | -1.38 | 0.08 |
| Tspan17       | -2.02  | 0.01 | 1.45 | 0.01 | 1.21  | 0.33 |
| Pbxip1        | -1.65  | 0.18 | 1.45 | 0.00 | -1.21 | 0.28 |
| Myo1g         | -3.06  | 0.05 | 1.45 | 0.02 | -1.59 | 0.03 |
| Thbs2         | -2.63  | 0.01 | 1.45 | 0.03 | -3.35 | 0.00 |
| Ly6e          | -2.50  | 0.07 | 1.46 | 0.04 | -2.35 | 0.01 |
| Epb4.1l3      | -2.19  | 0.00 | 1.46 | 0.01 | 1.04  | 0.90 |
| Ifi30         | -3.39  | 0.01 | 1.46 | 0.02 | -1.17 | 0.33 |
| Rela          | -1.49  | 0.00 | 1.46 | 0.01 | -1.07 | 0.66 |
| Elovl2        | 1.63   | 0.00 | 1.46 | 0.03 | 1.02  | 0.92 |
| Btk           | -2.41  | 0.00 | 1.46 | 0.00 | -1.25 | 0.24 |
| Entpd2        | -1.96  | 0.00 | 1.47 | 0.05 | -3.82 | 0.00 |
| Flna          | -2.12  | 0.00 | 1.47 | 0.00 | -2.96 | 0.00 |
| Btbd11        | -2.26  | 0.00 | 1.47 | 0.01 | -1.11 | 0.60 |
| Apob48r       | -1.92  | 0.21 | 1.47 | 0.00 | -1.50 | 0.04 |
| BC032204      | -3.07  | 0.00 | 1.47 | 0.02 | -1.17 | 0.40 |
| Btc           | -2.49  | 0.00 | 1.47 | 0.09 | -2.03 | 0.01 |
| Cyba          | -2.85  | 0.04 | 1.48 | 0.03 | -1.72 | 0.03 |
| Serpina3g     | -2.18  | 0.08 | 1.48 | 0.01 | 1.29  | 0.24 |
| Ccl3          | -10.86 | 0.00 | 1.48 | 0.13 | -2.14 | 0.01 |
| Cyp2f2        | -2.59  | 0.00 | 1.48 | 0.00 | 1.06  | 0.72 |
| Pld3          | -1.68  | 0.00 | 1.48 | 0.01 | -1.40 | 0.06 |
| Spink3        | -3.52  | 0.01 | 1.48 | 0.14 | -6.64 | 0.00 |

|               |        |      |      |      |       |      |
|---------------|--------|------|------|------|-------|------|
| F11           | 2.32   | 0.00 | 1.48 | 0.03 | -1.39 | 0.08 |
| Tbxas1        | -2.19  | 0.15 | 1.48 | 0.03 | -1.98 | 0.02 |
| Serpinc1      | 1.55   | 0.01 | 1.49 | 0.02 | 1.08  | 0.65 |
| Iqgap1        | -2.80  | 0.00 | 1.49 | 0.00 | -2.56 | 0.00 |
| Mkl1          | -1.72  | 0.14 | 1.49 | 0.05 | -1.72 | 0.03 |
| Kcnk5         | 1.69   | 0.00 | 1.49 | 0.15 | 1.95  | 0.26 |
| D11Ert636e    | 2.84   | 0.00 | 1.50 | 0.02 | 4.73  | 0.00 |
| Abi3          | -2.21  | 0.00 | 1.50 | 0.00 | -1.22 | 0.26 |
| Lamc1         | -2.60  | 0.00 | 1.50 | 0.00 | -1.82 | 0.01 |
| D15Ert735e    | 1.59   | 0.04 | 1.50 | 0.00 | 1.02  | 0.91 |
| Mapkbp1       | 1.81   | 0.20 | 1.50 | 0.02 | 1.31  | 0.16 |
| Fbn1          | -5.87  | 0.03 | 1.51 | 0.01 | -2.21 | 0.00 |
| Lyzs          | -5.60  | 0.00 | 1.51 | 0.04 | -3.58 | 0.00 |
| Micall2       | -1.96  | 0.13 | 1.51 | 0.01 | -2.39 | 0.00 |
| Smpd3b        | -17.35 | 0.05 | 1.51 | 0.00 | 1.00  | 0.99 |
| Al840980      | -2.49  | 0.00 | 1.51 | 0.00 | -1.52 | 0.09 |
| Serinc2       | -5.24  | 0.00 | 1.51 | 0.01 | 1.19  | 0.35 |
| Slc15a3       | -3.08  | 0.00 | 1.51 | 0.01 | -1.97 | 0.01 |
| Sh3bgrl3      | -3.40  | 0.03 | 1.51 | 0.01 | -1.97 | 0.01 |
| Slc7a8        | -2.69  | 0.05 | 1.51 | 0.01 | -2.21 | 0.01 |
| Fkbp1a        | -2.07  | 0.00 | 1.51 | 0.00 | -1.09 | 0.60 |
| Lum           | -2.95  | 0.09 | 1.51 | 0.00 | -3.27 | 0.00 |
| Mpp1          | -1.53  | 0.00 | 1.52 | 0.00 | -1.71 | 0.03 |
| Tmem65        | -1.69  | 0.00 | 1.52 | 0.00 | -1.29 | 0.22 |
| Abcc5         | -1.89  | 0.17 | 1.52 | 0.02 | -2.71 | 0.00 |
| Myo9b         | -2.06  | 0.00 | 1.52 | 0.00 | -2.38 | 0.00 |
| Ccl9          | -3.90  | 0.02 | 1.52 | 0.04 | -1.70 | 0.03 |
| Arhgdib       | -2.28  | 0.02 | 1.52 | 0.00 | -1.82 | 0.01 |
| Slc40a1       | -1.65  | 0.00 | 1.52 | 0.00 | -1.66 | 0.06 |
| Igfbp7        | -1.62  | 0.00 | 1.53 | 0.00 | -1.75 | 0.01 |
| Acac          | -1.49  | 0.06 | 1.53 | 0.01 | 1.46  | 0.15 |
| EG13909       | 1.68   | 0.01 | 1.53 | 0.02 | 1.10  | 0.57 |
| 1810010N17Rik | 1.67   | 0.03 | 1.53 | 0.00 | 1.11  | 0.49 |
| Tmsb10        | -3.19  | 0.15 | 1.53 | 0.01 | -2.94 | 0.00 |
| Lgals6        | 1.73   | 0.11 | 1.53 | 0.03 | -1.10 | 0.60 |
| P2ry6         | -2.97  | 0.08 | 1.53 | 0.00 | -2.21 | 0.01 |
| Gnmt          | 1.61   | 0.00 | 1.53 | 0.01 | -1.24 | 0.27 |
| Coro1a        | -3.14  | 0.00 | 1.54 | 0.02 | -2.25 | 0.01 |
| 2310057H16Rik | -2.98  | 0.00 | 1.54 | 0.08 | -5.76 | 0.00 |
| Pkm2          | -2.56  | 0.00 | 1.54 | 0.01 | -1.87 | 0.01 |
| Ang1          | 2.21   | 0.00 | 1.54 | 0.08 | 1.00  | 0.99 |
| Serpinf2      | 1.57   | 0.00 | 1.54 | 0.01 | 1.02  | 0.91 |
| Ppic          | -2.11  | 0.02 | 1.54 | 0.01 | -2.38 | 0.00 |
| Tyrobp        | -2.66  | 0.02 | 1.54 | 0.01 | -1.88 | 0.01 |
| Nedd9         | -1.79  | 0.05 | 1.54 | 0.00 | -1.29 | 0.32 |
| Apaf1         | -1.71  | 0.06 | 1.54 | 0.00 | -1.20 | 0.27 |
| 2310061N23Rik | -3.08  | 0.06 | 1.54 | 0.02 | -2.92 | 0.00 |
| Ccl6          | -3.90  | 0.00 | 1.55 | 0.01 | -1.21 | 0.45 |
| Tpm4          | -1.90  | 0.00 | 1.55 | 0.01 | -2.37 | 0.00 |
| Rps6ka4       | -1.63  | 0.02 | 1.55 | 0.00 | -1.43 | 0.08 |
| Msn           | -2.58  | 0.09 | 1.55 | 0.00 | -1.22 | 0.29 |
| Anxa2         | -7.06  | 0.00 | 1.55 | 0.05 | -4.69 | 0.00 |



|               |        |      |      |      |        |      |
|---------------|--------|------|------|------|--------|------|
| Apom          | 1.91   | 0.01 | 1.55 | 0.00 | 1.39   | 0.08 |
| Serpinb6a     | -1.85  | 0.00 | 1.55 | 0.00 | -1.18  | 0.34 |
| 1810046124Rik | -4.51  | 0.01 | 1.55 | 0.03 | -3.08  | 0.00 |
| Irf7          | -2.11  | 0.13 | 1.55 | 0.01 | 1.09   | 0.72 |
| Hcls1         | -2.39  | 0.00 | 1.56 | 0.01 | -2.04  | 0.00 |
| Atp6v1b2      | -1.55  | 0.05 | 1.56 | 0.00 | -1.12  | 0.49 |
| 1810008K03Rik | -2.22  | 0.00 | 1.57 | 0.08 | 4.26   | 0.00 |
| Nagk          | -1.69  | 0.00 | 1.58 | 0.00 | 1.04   | 0.85 |
| Cyp2d9        | 1.68   | 0.02 | 1.58 | 0.00 | 1.42   | 0.07 |
| Aoah          | -7.63  | 0.00 | 1.58 | 0.00 | -1.11  | 0.54 |
| Col5a1        | -2.32  | 0.00 | 1.59 | 0.01 | -2.80  | 0.00 |
| Mvp           | -2.14  | 0.00 | 1.59 | 0.01 | -1.07  | 0.68 |
| Evl           | -3.47  | 0.01 | 1.59 | 0.04 | -2.63  | 0.00 |
| Got1          | 1.75   | 0.03 | 1.59 | 0.02 | 1.12   | 0.83 |
| Csf1r         | -2.08  | 0.00 | 1.59 | 0.00 | -1.26  | 0.27 |
| Slc11a1       | -1.79  | 0.00 | 1.60 | 0.00 | -1.69  | 0.02 |
| Sn            | -2.27  | 0.11 | 1.60 | 0.00 | -1.10  | 0.58 |
| Cbr3          | -10.69 | 0.03 | 1.60 | 0.06 | -11.08 | 0.00 |
| Nck2          | -1.72  | 0.01 | 1.61 | 0.07 | -1.53  | 0.13 |
| Ms4a6d        | -3.60  | 0.02 | 1.61 | 0.00 | -1.00  | 0.99 |
| D2Bwg0891e    | -1.88  | 0.00 | 1.61 | 0.02 | -1.95  | 0.01 |
| Ppl           | -1.87  | 0.02 | 1.61 | 0.01 | -1.37  | 0.23 |
| Samd4         | -3.30  | 0.00 | 1.61 | 0.01 | -2.39  | 0.00 |
| Ctsk          | -3.18  | 0.15 | 1.61 | 0.03 | -2.09  | 0.01 |
| S100a11       | -7.90  | 0.00 | 1.61 | 0.01 | -5.65  | 0.00 |
| Igfbp3        | -2.23  | 0.00 | 1.62 | 0.01 | -1.23  | 0.40 |
| Aldh3b1       | -2.15  | 0.02 | 1.62 | 0.01 | 1.04   | 0.86 |
| Abr           | -3.25  | 0.00 | 1.62 | 0.00 | -1.45  | 0.06 |
| Fyb           | -3.47  | 0.00 | 1.62 | 0.02 | -2.02  | 0.01 |
| Sirpb1        | -7.28  | 0.02 | 1.62 | 0.04 | -2.42  | 0.00 |
| Cpxm1         | -3.10  | 0.02 | 1.63 | 0.06 | -5.95  | 0.00 |
| Scara3        | -1.71  | 0.03 | 1.63 | 0.00 | -2.71  | 0.00 |
| D330037A14Rik | -2.00  | 0.05 | 1.63 | 0.00 | -2.20  | 0.00 |
| Serpina11     | 1.79   | 0.06 | 1.63 | 0.00 | 2.04   | 0.00 |
| Mknk2         | -1.60  | 0.00 | 1.64 | 0.02 | -1.63  | 0.03 |
| Ccbl1         | 1.78   | 0.11 | 1.64 | 0.00 | 1.51   | 0.04 |
| Enpp6         | -2.65  | 0.03 | 1.64 | 0.00 | 3.65   | 0.00 |
| Il10ra        | -2.10  | 0.01 | 1.64 | 0.00 | -1.73  | 0.01 |
| Mcm10         | 1.80   | 0.00 | 1.64 | 0.00 | -1.62  | 0.19 |
| Prkx          | -1.82  | 0.04 | 1.64 | 0.00 | -1.34  | 0.12 |
| Adora1        | -1.73  | 0.02 | 1.65 | 0.01 | -1.03  | 0.89 |
| Il10rb        | -1.73  | 0.13 | 1.65 | 0.01 | -2.17  | 0.00 |
| Mod1          | -1.57  | 0.08 | 1.65 | 0.12 | 1.99   | 0.01 |
| Slamf9        | -3.08  | 0.02 | 1.66 | 0.04 | -3.57  | 0.00 |
| Usp18         | -2.04  | 0.05 | 1.66 | 0.00 | 1.10   | 0.69 |
| Vav1          | -2.76  | 0.00 | 1.66 | 0.00 | -1.51  | 0.04 |
| Renbp         | -2.04  | 0.00 | 1.66 | 0.00 | 1.17   | 0.35 |
| P2rx4         | -1.58  | 0.07 | 1.67 | 0.00 | -1.04  | 0.83 |
| Rbpms         | -1.52  | 0.01 | 1.67 | 0.01 | -1.40  | 0.08 |
| Hmgn2         | 2.27   | 0.00 | 1.67 | 0.03 | -1.18  | 0.53 |
| Mfge8         | -2.07  | 0.00 | 1.68 | 0.01 | -2.51  | 0.00 |
| Trib3         | -1.91  | 0.04 | 1.68 | 0.06 | -2.52  | 0.02 |



|               |        |      |      |      |       |      |
|---------------|--------|------|------|------|-------|------|
| Gstm1         | -2.40  | 0.00 | 1.68 | 0.00 | -1.16 | 0.45 |
| Sdc3          | -2.18  | 0.00 | 1.68 | 0.00 | -1.21 | 0.26 |
| Sgk           | -1.67  | 0.02 | 1.68 | 0.02 | 1.00  | 0.99 |
| A030007D23Rik | -1.72  | 0.09 | 1.69 | 0.01 | 1.25  | 0.22 |
| Cd14          | -3.15  | 0.00 | 1.69 | 0.01 | -1.37 | 0.50 |
| Prkcd         | -1.91  | 0.00 | 1.69 | 0.00 | -1.68 | 0.05 |
| 4632428M11Rik | 1.50   | 0.12 | 1.69 | 0.00 | 1.17  | 0.35 |
| Hspg2         | -1.69  | 0.00 | 1.69 | 0.00 | -1.70 | 0.01 |
| 2610001E17Rik | -2.65  | 0.00 | 1.69 | 0.00 | -4.07 | 0.00 |
| 8430438D04Rik | 2.57   | 0.00 | 1.70 | 0.00 | 1.36  | 0.13 |
| Golph2        | -3.10  | 0.00 | 1.70 | 0.01 | -2.51 | 0.01 |
| Fbxo31        | 1.50   | 0.00 | 1.71 | 0.00 | 3.73  | 0.01 |
| Aprt          | -1.68  | 0.02 | 1.71 | 0.01 | -1.65 | 0.02 |
| 1700093E07Rik | -1.81  | 0.00 | 1.71 | 0.00 | -1.24 | 0.31 |
| Nrg1          | -5.81  | 0.00 | 1.72 | 0.25 | -1.49 | 0.08 |
| Lcn2          | -5.64  | 0.11 | 1.72 | 0.11 | 2.34  | 0.46 |
| Slc39a4       | -6.87  | 0.00 | 1.72 | 0.00 | 1.01  | 0.97 |
| C1qa          | -1.96  | 0.00 | 1.73 | 0.00 | -1.52 | 0.07 |
| Dgkz          | -1.60  | 0.00 | 1.73 | 0.00 | -1.41 | 0.29 |
| Arpc1b        | -1.99  | 0.09 | 1.73 | 0.00 | -1.43 | 0.09 |
| Rras          | -1.52  | 0.00 | 1.73 | 0.00 | -1.25 | 0.19 |
| Efha1         | -1.80  | 0.00 | 1.73 | 0.00 | -1.66 | 0.04 |
| Capg          | -5.21  | 0.00 | 1.73 | 0.02 | -3.08 | 0.00 |
| Efemp2        | -1.96  | 0.04 | 1.74 | 0.00 | -3.15 | 0.00 |
| 1810009M01Rik | -2.12  | 0.00 | 1.74 | 0.01 | -1.55 | 0.02 |
| C8a           | 1.53   | 0.05 | 1.74 | 0.00 | 1.01  | 0.96 |
| Bgn           | -1.54  | 0.15 | 1.74 | 0.03 | -1.06 | 0.74 |
| Fads2         | 1.76   | 0.00 | 1.74 | 0.01 | -1.43 | 0.06 |
| Tnfrsf12a     | -2.64  | 0.00 | 1.75 | 0.13 | -3.21 | 0.00 |
| Tlr2          | -4.46  | 0.00 | 1.76 | 0.01 | -1.95 | 0.01 |
| Kng1          | 2.31   | 0.00 | 1.76 | 0.01 | 1.10  | 0.57 |
| Gltp          | -2.67  | 0.01 | 1.76 | 0.00 | -1.30 | 0.21 |
| Atf3          | -10.91 | 0.00 | 1.76 | 0.12 | -5.85 | 0.01 |
| Cd68          | -3.64  | 0.00 | 1.76 | 0.00 | -2.30 | 0.01 |
| Col16a1       | -1.90  | 0.00 | 1.77 | 0.00 | -2.10 | 0.02 |
| Col4a2        | -1.57  | 0.01 | 1.78 | 0.00 | -1.32 | 0.28 |
| Olfml3        | -2.45  | 0.06 | 1.78 | 0.00 | -3.69 | 0.00 |
| Scamp5        | -1.88  | 0.00 | 1.78 | 0.00 | 1.00  | 0.99 |
| Armxc3        | -1.68  | 0.05 | 1.79 | 0.00 | -1.28 | 0.20 |
| Cd63          | -5.73  | 0.00 | 1.79 | 0.01 | -4.99 | 0.00 |
| Cd84          | -2.66  | 0.06 | 1.80 | 0.00 | -1.29 | 0.23 |
| Lyz           | -4.50  | 0.00 | 1.81 | 0.01 | -3.28 | 0.00 |
| Saa3          | -5.83  | 0.17 | 1.81 | 0.22 | 4.52  | 0.15 |
| 2410004L22Rik | -5.31  | 0.00 | 1.81 | 0.01 | -5.04 | 0.00 |
| Rab11fip5     | -3.01  | 0.01 | 1.82 | 0.00 | -1.95 | 0.01 |
| AU040829      | -3.33  | 0.02 | 1.82 | 0.02 | -2.54 | 0.04 |
| 2610020H15Rik | -2.67  | 0.09 | 1.82 | 0.00 | -1.11 | 0.59 |
| Syt1          | 1.80   | 0.06 | 1.82 | 0.00 | 1.62  | 0.10 |
| Gmip          | -2.29  | 0.04 | 1.83 | 0.00 | -1.60 | 0.05 |
| Csad          | 4.11   | 0.00 | 1.84 | 0.00 | -1.04 | 0.86 |
| Arhgap4       | -1.86  | 0.00 | 1.84 | 0.00 | 1.05  | 0.81 |
| Gja4          | 1.79   | 0.00 | 1.87 | 0.00 | 1.83  | 0.01 |

|               |       |      |      |      |       |      |
|---------------|-------|------|------|------|-------|------|
| Sparc         | -2.21 | 0.02 | 1.87 | 0.01 | -2.60 | 0.00 |
| Phlda3        | -3.48 | 0.00 | 1.88 | 0.03 | -4.95 | 0.00 |
| Syt11         | -4.12 | 0.00 | 1.88 | 0.00 | 1.77  | 0.05 |
| Clec4n        | -2.81 | 0.02 | 1.90 | 0.01 | 1.07  | 0.73 |
| Rhbd1         | -1.91 | 0.00 | 1.90 | 0.00 | -1.67 | 0.02 |
| Selenbp2      | 3.27  | 0.03 | 1.90 | 0.01 | -2.22 | 0.00 |
| Rab34         | -2.01 | 0.00 | 1.90 | 0.00 | 1.06  | 0.73 |
| Ank3          | -1.70 | 0.15 | 1.90 | 0.00 | -1.22 | 0.25 |
| Myo1f         | -3.22 | 0.04 | 1.91 | 0.00 | -2.48 | 0.01 |
| C1qb          | -2.80 | 0.00 | 1.91 | 0.00 | -1.38 | 0.10 |
| Icam1         | -2.63 | 0.00 | 1.91 | 0.00 | -1.32 | 0.24 |
| Hp            | -1.53 | 0.00 | 1.91 | 0.00 | 1.16  | 0.41 |
| Col1a2        | -3.89 | 0.00 | 1.92 | 0.00 | -6.43 | 0.00 |
| 3732413111Rik | -1.74 | 0.00 | 1.92 | 0.00 | -1.15 | 0.62 |
| 6330406P08Rik | 1.90  | 0.00 | 1.93 | 0.02 | 1.30  | 0.34 |
| E130012A19Rik | 3.64  | 0.03 | 1.93 | 0.00 | 1.44  | 0.34 |
| Pdgfa         | -2.04 | 0.00 | 1.94 | 0.02 | -2.90 | 0.01 |
| Trim47        | -2.16 | 0.00 | 1.94 | 0.00 | -2.63 | 0.00 |
| Ptpre         | -2.78 | 0.02 | 1.95 | 0.02 | -1.63 | 0.07 |
| Smox          | -1.54 | 0.06 | 1.95 | 0.01 | -2.64 | 0.00 |
| Spic          | -3.19 | 0.00 | 1.96 | 0.02 | -1.33 | 0.11 |
| Tpm1          | -1.87 | 0.00 | 1.98 | 0.00 | -1.92 | 0.01 |
| Serpina3m     | 1.56  | 0.15 | 1.98 | 0.00 | 1.27  | 0.19 |
| Foxa3         | 1.54  | 0.06 | 1.99 | 0.02 | 1.19  | 0.40 |
| Flot1         | -1.68 | 0.00 | 1.99 | 0.00 | -1.01 | 0.95 |
| C6            | 1.55  | 0.03 | 2.00 | 0.01 | -1.06 | 0.72 |
| BC003277      | -2.37 | 0.00 | 2.01 | 0.00 | 1.02  | 0.94 |
| Adrb2         | -3.56 | 0.16 | 2.03 | 0.01 | 1.14  | 0.52 |
| Cdc42ep5      | -2.08 | 0.01 | 2.03 | 0.02 | -3.84 | 0.00 |
| C230093N12Rik | -1.70 | 0.03 | 2.04 | 0.00 | -2.33 | 0.09 |
| Xlkd1         | -2.34 | 0.00 | 2.04 | 0.00 | 1.01  | 0.99 |
| Col6a1        | -1.88 | 0.07 | 2.04 | 0.00 | -3.59 | 0.00 |
| Cyb561        | -1.69 | 0.01 | 2.05 | 0.02 | 1.60  | 0.05 |
| Bhlhb9        | -3.78 | 0.00 | 2.05 | 0.00 | 1.41  | 0.32 |
| Rab3d         | -1.87 | 0.00 | 2.05 | 0.00 | 1.08  | 0.77 |
| Sla           | -2.79 | 0.01 | 2.06 | 0.00 | 1.05  | 0.78 |
| Col4a1        | -2.22 | 0.00 | 2.06 | 0.00 | -1.69 | 0.13 |
| Dtx3          | -1.62 | 0.01 | 2.08 | 0.00 | -1.70 | 0.05 |
| Tlr1          | -6.00 | 0.01 | 2.10 | 0.01 | -4.50 | 0.01 |
| Loxl1         | -2.09 | 0.06 | 2.11 | 0.00 | -4.37 | 0.00 |
| Hey1          | -2.68 | 0.04 | 2.11 | 0.01 | -3.34 | 0.00 |
| Maged2        | -2.10 | 0.00 | 2.16 | 0.00 | -1.91 | 0.03 |
| Psd4          | -3.83 | 0.01 | 2.18 | 0.00 | -1.82 | 0.12 |
| Fgf21         | -2.40 | 0.01 | 2.19 | 0.04 | -1.39 | 0.29 |
| Unc5b         | -1.88 | 0.17 | 2.20 | 0.00 | -1.56 | 0.08 |
| Adamts2       | -1.90 | 0.00 | 2.22 | 0.00 | -2.20 | 0.01 |
| Gfra1         | 1.59  | 0.14 | 2.22 | 0.00 | 2.54  | 0.03 |
| Hpxn          | -1.73 | 0.00 | 2.23 | 0.00 | -1.15 | 0.40 |
| Rhoc          | -2.32 | 0.09 | 2.23 | 0.00 | -3.10 | 0.00 |
| Serpina3k     | 2.68  | 0.00 | 2.26 | 0.00 | 1.29  | 0.19 |
| Axl           | -2.35 | 0.01 | 2.26 | 0.00 | -1.76 | 0.02 |
| Ier3          | -1.87 | 0.18 | 2.28 | 0.00 | 1.15  | 0.59 |

|               |        |      |       |      |        |      |
|---------------|--------|------|-------|------|--------|------|
| 6330416G13Rik | -2.11  | 0.00 | 2.28  | 0.00 | 1.58   | 0.12 |
| Sprr1a        | -3.36  | 0.01 | 2.30  | 0.02 | -4.84  | 0.00 |
| Vim           | -3.12  | 0.01 | 2.34  | 0.00 | -1.93  | 0.01 |
| Gpx7          | -2.67  | 0.13 | 2.37  | 0.00 | -5.19  | 0.00 |
| Sdcbp2        | -61.53 | 0.00 | 2.39  | 0.00 | -11.14 | 0.00 |
| C330027I04Rik | -3.19  | 0.06 | 2.41  | 0.00 | 1.12   | 0.54 |
| Csrp1         | -2.23  | 0.00 | 2.45  | 0.00 | -2.12  | 0.00 |
| 4933408F15    | -2.23  | 0.00 | 2.54  | 0.02 | -2.58  | 0.10 |
| BC005471      | -2.10  | 0.04 | 2.54  | 0.00 | 1.03   | 0.92 |
| Ms4a7         | -6.66  | 0.00 | 2.54  | 0.02 | -6.90  | 0.00 |
| Cyp4f16       | -2.58  | 0.01 | 2.60  | 0.00 | 1.28   | 0.15 |
| Tes           | -2.97  | 0.13 | 2.61  | 0.03 | -2.38  | 0.00 |
| Lgmn          | -2.77  | 0.00 | 2.62  | 0.00 | -1.49  | 0.05 |
| Cyp7a1        | 2.65   | 0.00 | 2.66  | 0.00 | -1.18  | 0.72 |
| Lpl           | -6.19  | 0.04 | 2.66  | 0.01 | -4.15  | 0.00 |
| Nenf          | -2.61  | 0.00 | 2.71  | 0.00 | -1.37  | 0.09 |
| Irak3         | -3.29  | 0.03 | 2.72  | 0.00 | 1.33   | 0.31 |
| Cln6          | -1.99  | 0.00 | 2.73  | 0.00 | -1.31  | 0.35 |
| Emp1          | -4.05  | 0.07 | 2.76  | 0.01 | -5.15  | 0.00 |
| Ntrk2         | -11.45 | 0.00 | 2.77  | 0.03 | -28.99 | 0.00 |
| Parvg         | -4.95  | 0.03 | 2.77  | 0.00 | -1.80  | 0.02 |
| Col3a1        | -4.49  | 0.00 | 2.80  | 0.00 | -9.94  | 0.00 |
| Nupr1         | -4.97  | 0.01 | 2.80  | 0.01 | -3.33  | 0.00 |
| Ly6d          | -15.68 | 0.00 | 2.80  | 0.04 | -39.84 | 0.00 |
| Pla2g7        | -3.17  | 0.07 | 2.82  | 0.00 | -1.07  | 0.67 |
| Smpd3         | -2.14  | 0.00 | 3.10  | 0.00 | -3.31  | 0.00 |
| Rbp1          | -2.88  | 0.09 | 3.24  | 0.00 | -5.33  | 0.00 |
| Slc6a8        | -2.83  | 0.00 | 3.26  | 0.00 | -1.35  | 0.12 |
| Eppk1         | -1.83  | 0.03 | 3.46  | 0.00 | 1.20   | 0.45 |
| 2310032D16Rik | 1.73   | 0.16 | 3.52  | 0.00 | -1.22  | 0.67 |
| Mmp12         | -15.25 | 0.01 | 3.55  | 0.01 | -4.33  | 0.00 |
| Uap111        | -5.68  | 0.00 | 3.60  | 0.00 | -5.59  | 0.00 |
| Trem2         | -12.38 | 0.11 | 3.74  | 0.01 | -7.20  | 0.00 |
| Apoa4         | -1.79  | 0.06 | 3.79  | 0.01 | -2.12  | 0.26 |
| Gal3st1       | -12.09 | 0.00 | 3.82  | 0.00 | -1.18  | 0.51 |
| Ccnd1         | -4.17  | 0.03 | 4.25  | 0.00 | -7.73  | 0.02 |
| 1810054O13Rik | -2.24  | 0.00 | 4.42  | 0.00 | -2.11  | 0.01 |
| Col1a1        | -6.79  | 0.01 | 4.64  | 0.00 | -14.89 | 0.00 |
| Ccdc3         | -2.83  | 0.00 | 4.74  | 0.00 | -2.32  | 0.00 |
| Slc41a3       | -3.47  | 0.01 | 4.75  | 0.00 | 1.38   | 0.42 |
| Gadd45g       | 1.58   | 0.13 | 5.06  | 0.00 | 4.03   | 0.03 |
| Osbpl3        | -2.74  | 0.00 | 5.50  | 0.00 | -4.30  | 0.00 |
| Psat1         | -17.63 | 0.00 | 5.54  | 0.00 | -2.93  | 0.00 |
| 4922503N01Rik | -4.39  | 0.00 | 5.61  | 0.00 | -3.54  | 0.00 |
| Cidec         | -11.65 | 0.00 | 5.72  | 0.02 | -4.32  | 0.18 |
| BC051083      | -12.15 | 0.00 | 5.83  | 0.00 | -2.46  | 0.00 |
| Esm1          | -5.90  | 0.00 | 6.55  | 0.02 | -16.23 | 0.00 |
| Asns          | 10.86  | 0.01 | 8.50  | 0.00 | -2.22  | 0.01 |
| Gpnmb         | -32.51 | 0.11 | 10.94 | 0.00 | -1.20  | 0.53 |

## Highlights

- High carbohydrate, LF12 diet stimulates stellate activation and inflammation genes
- Retinol and *Shp* modulate gene expression associated with a high carbohydrate diet
- Retinol restrains stellate and inflammation genes in mice fed a high fat diet
- Gestational VA deficient diet lowers serum retinol, liver retinoids, and *Cyp26a1*
- Maternal and post-weaning LF12 enhances VA deficiency-induced retinol suppression
